# 1           **Quantifying proximity, confinement, and interventions in disease** 2           **outbreaks: a decision support framework for air-transported pathogens**

3           Tami C. Bond<sup>1\*</sup>, Angela Bosco-Lauth<sup>2</sup>, Delphine K. Farmer<sup>3</sup>, Paul W. Francisco<sup>4,5</sup>,  
4           Jeffrey R. Pierce<sup>6</sup>, Kristen M. Fedak<sup>7</sup>, Jay M. Ham<sup>8</sup>, Shantanu H. Jathar<sup>1</sup>, Sue  
5           VandeWoude<sup>9</sup>

6           <sup>1</sup> Department of Mechanical Engineering, Colorado State University, Fort Collins,  
7           Colorado, USA.

8           <sup>2</sup> College of Veterinary Medicine and Biomedical Sciences, Colorado State University,  
9           Fort Collins, Colorado, USA.

10          <sup>3</sup> Department of Chemistry, Colorado State University, Fort Collins, Colorado, USA.

11          <sup>4</sup> Energy Institute, Colorado State University, Fort Collins, Colorado, USA.

12          <sup>5</sup> Indoor Climate Research and Training, Applied Research Institute, University of Illinois  
13          at Urbana-Champaign, Champaign, Illinois, USA.

14          <sup>6</sup> Department of Atmospheric Sciences, Colorado State University, Fort Collins,  
15          Colorado, USA.

16          <sup>7</sup> Department of Environmental and Radiological Health Science, Colorado State  
17          University, Fort Collins, Colorado, USA.

18          <sup>8</sup> Department of Soil and Crop Science, Colorado State University, Fort Collins,  
19          Colorado, USA.

20          <sup>9</sup> Department of Microbiology, Immunology, and Pathology, Colorado State University,  
21          Fort Collins, Colorado, USA.

22          \*Correspondence to: [Tami.Bond@colostate.edu](mailto:Tami.Bond@colostate.edu)

## 23          **Abstract**

24          The inability to communicate how infectious diseases are transmitted in human  
25          environments has triggered avoidance of interactions during the COVID-19  
26          pandemic. We define a metric, Effective ReBreathed Volume (ERBV), that  
27          encapsulates how infectious pathogens transport in air. This measure distinguishes  
28          environmental transport from other factors in the chain of infection, thus allowing  
29          quantitative comparisons of the riskiness of different situations for any pathogens  
30          transported in air, including SARS-CoV-2. Particle size is a key factor in transport,  
31          removal onto surfaces, and elimination by mitigation measures, so ERBV is  
32          presented for a range of exhaled particle diameters: 1  $\mu\text{m}$ , 10  $\mu\text{m}$ , and 100  $\mu\text{m}$ .  
33          Pathogen transport is enhanced by two separate but interacting effects: proximity  
34          and confinement. Confinement in enclosed spaces overwhelms proximity after 10-  
35          15 minutes for all but the largest particles. Therefore, we review plausible strategies  
36          to reduce the confinement effect. Changes in standard ventilation and filtration can  
37          reduce person-to-person transport of 1- $\mu\text{m}$  particles (ERBV<sub>1</sub>) by 13-85% in  
38          residential and commercial situations. Deposition to surfaces competes with  
39          intentional removal for 10- $\mu\text{m}$  and 100- $\mu\text{m}$  particles, so the same interventions  
40          reduce ERBV<sub>10</sub> by only 3-50%, and ERBV<sub>100</sub> is unaffected. Determining transmission

41 modes is critical to identify intervention effectiveness, and would be accelerated  
42 with prior knowledge of ERBV. When judiciously selected, the interventions  
43 examined can provide substantial reduction in risk, and the conditions for selection  
44 are identified. The framework of size-dependent ERBV supports analysis and  
45 mitigation decisions in an emerging situation, even before other infectious  
46 parameters are well known.

47

## 48 **Introduction**

49 The spread of the SARS-CoV-2 virus has created a public health crisis and  
50 widespread economic disruption (1). Key factors in the extent of this crisis are (i)  
51 the severity of the disease, COVID-19, so avoidance is preferred over illness; (ii)  
52 transmission by asymptomatic or presymptomatic individuals (2, 3); and (iii) the  
53 novelty of the disease, so that decisions must occur before scientific investigations  
54 are definitive. Although this situation is unprecedented in the past century,  
55 pandemics have occurred throughout human history. An event like COVID-19 was  
56 predicted before its onset (4) and is likely to occur again with different infection  
57 dynamics (5, 6).

58 Figure 1 illustrates the chain of infection (7), modified to emphasize the role of  
59 person-to-person interactions. After a pathogen has entered the human population,  
60 escape from the human reservoir depends on the prevalence and characteristics of  
61 disease carriers or emitters. On the receiving end, the likelihood of infection is  
62 determined by the host's susceptibility and the dose received. The mode is the  
63 method of travel between the pathogen's release and the host. The pathogen's  
64 survival characteristics limit viable modes, but the environment modulates the  
65 transferred dose. This environment includes the social system that compels  
66 intersection between individuals, and the physical environment through which the  
67 pathogen travels. Uncertainty about physical transmission has led to suspicion  
68 about the interactions that underpin the economy. The ability to quantify exposure  
69 risks in social interactions more quickly and rigorously would aid decision-making  
70 in current and future outbreak situations.

71 Describing the chain of infection requires expertise in epidemiology, infectious  
72 disease, sociology and data science, engineered and natural environments, virology,  
73 immunology, and public health. Each field has burgeoned since Riley's pioneering  
74 work (8) combined carrier and environmental characteristics into a single equation,  
75 yet few metrics distill the essential elements of the chain for use in collaboration.  
76 This paper describes a metric to quantify pathogen transport and uses it to compare  
77 transmission environments and mitigation measures.

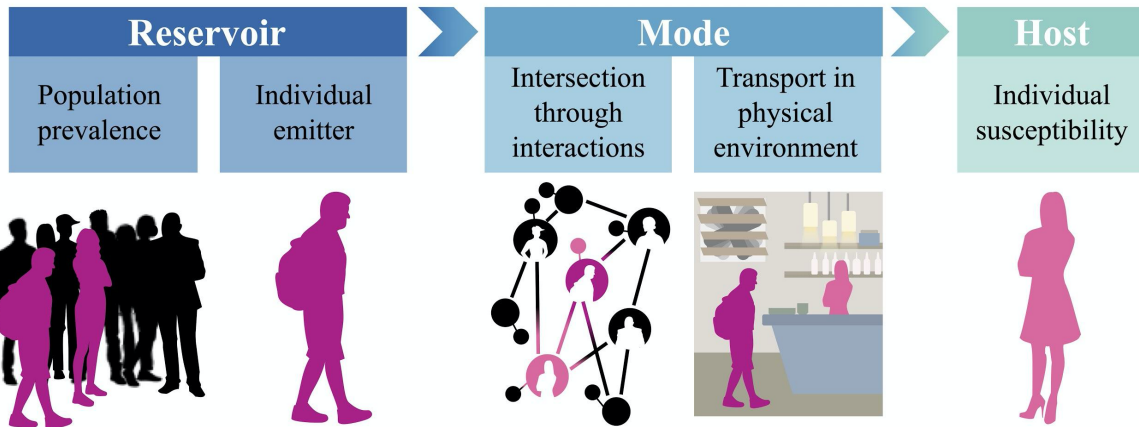

79 *Figure 1. Chain of infection for a disease whose spread depends on human interactions.*  
80 *Figure credit: Mj Riches*

### 81 ***Quantifying person-to-person transport***

82 A metric to characterize and communicate person-to-person transport would be  
83 understandable by individuals outside the field; able to encapsulate complex  
84 situations and incorporate evolving knowledge; generalizable to archetypal building  
85 situations; and germane to decision-making by comparing alternative interactions.  
86 It should not be confounded by differences in human emitters or recipients, which  
87 are independent of transport. We choose *rebreathed volume* (RBV) as a basic metric  
88 for this purpose. RBV is the total volume of air exhaled by one person and  
89 subsequently inhaled by another. RBV is proportional to the *total* dose that an  
90 individual receives; we also use the *rate* of rebreathing to compare different  
91 interactions of equal lengths. If a recipient were inhaling directly from the mouth of  
92 an emitter, the rebreathing rate would be  $8 \text{ L min}^{-1}$ , and over 10 minutes, RBV  
93 would be 80 L. RBV can be calculated from simple models, computational fluid  
94 dynamic models, and tracer measurements in both indoor and outdoor situations  
95 (S.1-S.4). RBV is similar to other metrics and can be calculated from them (S.10),  
96 including the Wells-Riley equation for probability of infection (8), inhalation intake  
97 fraction (9), or rebreathed fraction (10). Because RBV quantifies person-to-person  
98 transmission, the number of emitters also needs to be included in risk of infection.  
99 An additional “crowding” effect should be calculated separately.

100 A particular challenge in any emerging situation is uncertainty in the mode of  
101 transmission. Public health guidance (11) uses the terms “droplet” and “short-  
102 range” for large expiratory particles that transport through air but are lost quickly  
103 by falling. A second mode, via small particles that tend to follow airstreams, is  
104 termed “airborne,” “aerosol,” or “long-range.” A third mode is called “indirect” when  
105 pathogens are transferred through intermediate, contaminated objects, including  
106 human skin (12). Dominant modes of transmission are hotly debated for COVID-19  
107 (13, 14) and other respiratory infections (15).

108 Despite the differences in terminology, the dynamics of transport through air  
109 govern the first two modes, and play a role in the third. Our approach does not  
110 champion any particular mode, but instead acknowledges the importance of particle  
111 size in every step of the chain of infection. Particle size and viral content is  
112 influenced by where particles originate within the respiratory tract (16); size affects  
113 the depth of penetration into the recipient's lungs and susceptibility (17). Size  
114 dominates particle fate; large particles do not remain suspended as long and are  
115 easier to remove because of the relative influences of gravity, drag force, and  
116 attachment to surfaces or deposition.

117 To communicate transport dynamics of differently sized particles while maintaining  
118 simplicity, we define *effective rebreathed volume* (ERBV) as the exhaled volume that  
119 contains the same number of particles as the air inhaled by the recipient. If a  
120 recipient received 80 L of RBV from an emitter, and 90% of particles with diameter  
121 X were lost by settling, then  $ERBV_X$  would be 8 L (80 L multiplied by 10%  
122 remaining). This physics-based treatment allows objective comparison of modes by  
123 accounting for the main difference in particle transport: size-dependent loss.

124 We choose decadally-spaced sizes that cover a biologically-relevant range: 1, 10 and  
125 100  $\mu\text{m}$  ( $ERBV_1$ ,  $ERBV_{10}$ , and  $ERBV_{100}$ , respectively). Diameters of expiratory  
126 particles range from 0.01 to 1000  $\mu\text{m}$  (18–20), although the largest sizes are rarely  
127 measured. Particles the size of a bare virion (0.1–0.2  $\mu\text{m}$ ) travel like 1- $\mu\text{m}$  particles  
128 because they have similar indoor deposition loss rates (SI). 1000- $\mu\text{m}$  particles are  
129 excluded because they would travel less than 1 meter due to their rapid fall speeds.  
130 Large expiratory droplets evaporate within a few seconds (21, 22), and a 100- $\mu\text{m}$   
131 droplet would become about 20  $\mu\text{m}$  after losing 99% water content (23).

### 132 ***Proximity and confinement effects***

133 Person-to-person transport of pathogens is greater in close *proximity*, partly  
134 because contaminants spread out (disperse) as they travel away from an emitter,  
135 and partly because they also fall out (deposit) during that travel. Person-to-person  
136 transport is also greater in close *confinement*, where contaminants accumulate  
137 when they cannot escape the walls of an enclosure. Ventilation and other removal  
138 processes, including deposition, decrease the rate of accumulation in the confined  
139 space. Thus, the dose transferred from an emitter to a recipient depends upon  
140 dispersion, deposition, and other removal processes that lessen accumulation.  
141 Figure 2 compares the rate of rebreathing during simple maximum outdoor (red,  
142 shaded) and indoor (blue, dashed) interactions for 1- $\mu\text{m}$ , 10- $\mu\text{m}$ , and 100- $\mu\text{m}$   
143 particles. The contrast between the three particle sizes shows the importance of  
144 separate consideration.

145

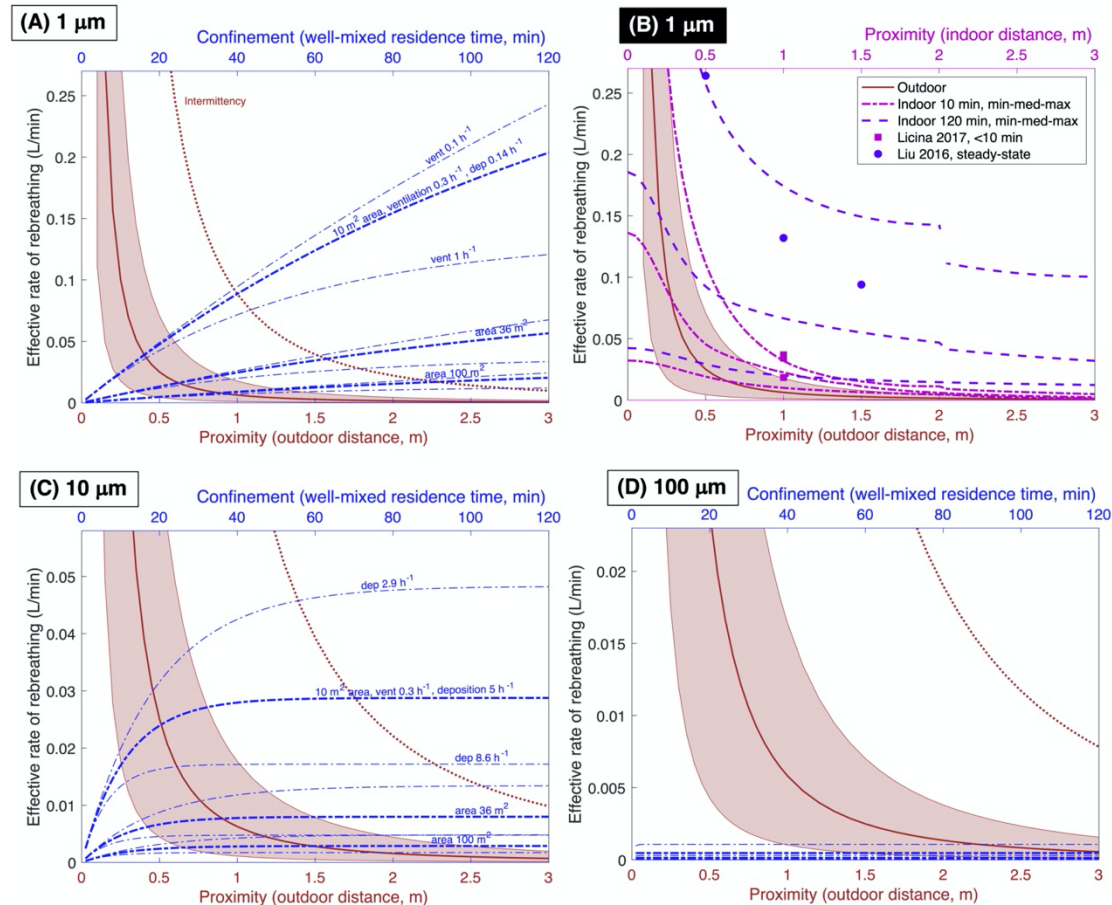

146  
147  
148  
149  
150  
151  
152  
153  
154  
155  
156  
157  
158  
159  
160  
161

Figure 2. Comparison of instantaneous effective rebreathing rate for outdoor (red, with shaded area) and indoor (blue, dashed) interactions for particles of diameter (A) 1  $\mu\text{m}$ ; (C) 10  $\mu\text{m}$ ; (D) 100  $\mu\text{m}$ . Proximity (lower) and confinement (upper) axes are not equivalent, but appear on the same figure for comparison. Outdoors, ERBV depends on proximity. Shaded region shows uncertainty in atmospheric dispersion with wind at 2 m s<sup>-1</sup>; intermittency (dotted red line) is the estimated maximum value due to emission-plume meandering. Indoors in a well-mixed room, confinement affects ERBV and depends on the time of accumulation. Thick blue dashed lines show a range of room sizes. Ventilation rates affect rebreathing for 1- $\mu\text{m}$  particles (light blue lines in [A]) and not for 100- $\mu\text{m}$  particles (D); rates of deposition to surfaces affect rebreathing for 10- $\mu\text{m}$  particles (C), as do ventilation rates (not shown). Panel (B) compares outdoor and indoor proximity for a range of simulated indoor conditions, for 1- $\mu\text{m}$  particles at 10 min and 120 min after emitter entry. Highest ERBV occurs in small rooms, which disappear from the summary curve when the maximum possible distance from emitter is reached, creating the discontinuity shown in the dashed lines. Rebreathing rates are person-to-person and would increase for more emitters.

162  
163  
164  
165  
166  
167  
168

Outside buildings, concentration decreases with distance from the emitter, because emitted particles are carried by wind and dispersed by air fluctuations. The proximity effect is especially attributable to dispersion, but also deposition for large particles. The gravitational settling that differentiates particles is negligible for 1- $\mu\text{m}$  and 10- $\mu\text{m}$  particles, but some 100- $\mu\text{m}$  particles have fallen out after traveling 2-3 m. Public guidance in 2020 suggests maintaining 2-m separation between individuals, avoiding the highest concentrations. At this distance, the outdoor

169 rebreathing rate is less than 0.01 L min<sup>-1</sup>, and would be even lower if the recipient  
170 were not directly downwind (Table 1).

171 Figure 2 also shows rebreathing in well-mixed, enclosed rooms (blue dashed  
172 curves), where the confinement effect occurs because exhaled air accumulates  
173 rather than dispersing. The rate of rebreathing depends on the room size, removal  
174 rates, and length of accumulation. Within 15 minutes indoors, the rebreathing rate  
175 for 1- $\mu$ m and 10- $\mu$ m particles exceeds that of a 2-m distance outdoors, with more  
176 rebreathing in small rooms. An individual who is unwilling to stand within 2 m of a  
177 potential emitter outdoors may unwittingly accept the same or greater risk by  
178 remaining in a moderate-sized room for 15 minutes.

179

180 **Table 1. Person-to-person effective rebreathed volume for 1- $\mu$ m particles**  
181 **(ERBV<sub>1</sub>) in common interactions.**

| Interaction                 | Effective rebreathed volume (liters) |           |           | Note  |
|-----------------------------|--------------------------------------|-----------|-----------|-------|
|                             | 15 min                               | 1 hour    | 4 hours   |       |
| <b>Outdoors</b>             |                                      |           |           |       |
| Directly downwind, 1m dist. | 0.02-0.14                            | 0.1-0.58  | 0.58-0.98 | a,b,c |
| same, 2m distance           | 0.005-0.04                           | 0.02-0.14 | 0.14-0.24 | "     |
| 45° from wind dir, 1m dist. | <0.0004                              | <0.001    | <0.006    | "     |
| <b>Indoors</b>              |                                      |           |           |       |
| Small room, 1m distance     | 0.17-0.28                            | 2.7-3.9   | 12.2-20   | d,e,f |
| same, 2m distance           | 0.063-0.071                          | 1.7-2.1   | 9.1-14    | "     |
| same, well mixed            | 0.066-0.071                          | 0.8-1.1   | 6.5-15    | e,f,g |
| Communal office, well mixed | 0.02-0.03                            | 0.3-0.4   | 2.7-5     | f,g,h |

182 (a) ERBV is proportional to interaction time, because there is no confinement effect. (b) Plume model with  
183 wind of 2.5 m s<sup>-1</sup>; urban topography, range of weather conditions. (c) Intermittency increase is not included,  
184 because fluctuations average out after 15-20 minutes. (d) From indoor point-release model, 0.3-0.8 ac h<sup>-1</sup>.  
185 (e) Floor area 36 m<sup>2</sup>, height 2.5 m, size of small conference room or living room. (f) Assuming emitter and  
186 recipient enter simultaneously. (g) From well-mixed zone model, 0.3-0.8 ac h<sup>-1</sup>. (h) Floor area 200 m<sup>2</sup>,  
187 height 3 m<sup>2</sup>.

188

189

190 The confinement effect is ameliorated by particle losses, which occur as particle-  
191 laden air travels out of the room through building cracks or through mechanical  
192 ventilation systems, or as they deposit on surfaces (24). Ventilation reduces the  
193 rebreathing rate noticeably for interaction times above about 30 minutes (Fig 2A).  
194 Particles of 100- $\mu\text{m}$  deposit rapidly and do not accrue, so indoor rebreathing is low,  
195 consistent with particles classically termed “droplets” (Fig 2D). Particles of 10  $\mu\text{m}$   
196 diameter deposit more quickly than smaller particles, so indoor values of  $\text{ERBV}_{10}$   
197 tend to be lower than  $\text{ERBV}_1$  (Fig 2B). Nevertheless, rebreathing of 10- $\mu\text{m}$  particles  
198 is still noticeable in confined spaces, and these particles may be the residue of larger  
199 evaporated particles.

200 Both proximity and confinement effects occur in enclosed spaces. Contaminants  
201 disperse quickly indoors until they are well mixed (25). Figure 2B shows indoor  
202 rebreathing rates simulated with a point-release model (26, 27) for a range of  
203 simplified dispersion rates (SI). After 10 minutes of residence time, indoor and  
204 outdoor proximity effects are similar. An elevated proximity effect, as well as a  
205 confinement effect throughout the room, occur after two hours. Indoor dispersion  
206 rates depend on the intensity of turbulence in the room, which in turn is affected by  
207 environmental conditions, surface properties, and sources of thermal energy. Even  
208 the buoyancy around a human body can affect dispersion (28). Also shown are  
209 values interpreted from chamber measurements (28, 29). Both simulations and  
210 measurements can quantify rebreathing in specific situations, but precise estimates  
211 are not needed for effective guidance to address both proximity and confinement.

212 Total ERBV is obtained by summing over the recipient’s entire residence time. Table  
213 1 summarizes  $\text{ERBV}_1$  over 15-minute, 1-hour, and 4-hour interactions, which  
214 represent a brief face-to-face commercial transaction, a business meeting, and a  
215 half-day working session, respectively. The definition of “close contact” from the  
216 Centers for Disease Control and Prevention is “within 6 feet for at least 15 minutes,”  
217 corresponding to a minimum ERBV of about 0.07 L for any particle size. Regardless  
218 of whether the participants are farther apart than 2-m distance, confinement in the  
219 two smaller rooms in Fig. 2 causes ERBV to exceed the “close-contact” value after  
220 about 10-15 minutes, for both 1- $\mu\text{m}$  and 10- $\mu\text{m}$  particles.

## 221 **Effect of mitigation measures**

222 Rebreathing can be lessened when the participants remain at a distance to reduce  
223 proximity effects. Other solutions are needed to reduce the confinement effect, and  
224 those are explored here. Figure 3 summarizes ERBV for a 4-hour stay in residential  
225 (Fig 3A) and commercial (Fig. 3B) settings.

226 The upper portion of the figure shows how size-dependent losses affect rebreathing:  
227  $\text{ERBV}_1$  is two orders of magnitude greater than  $\text{ERBV}_{100}$ . This difference does not  
228 imply that 1- $\mu\text{m}$  particles have the highest infectivity. If exhaled air contains few or  
229 no pathogens of this size, then the efficient transport indicated by high  $\text{ERBV}_1$  is  
230 unimportant. The high value does indicate that even a small release of pathogens in

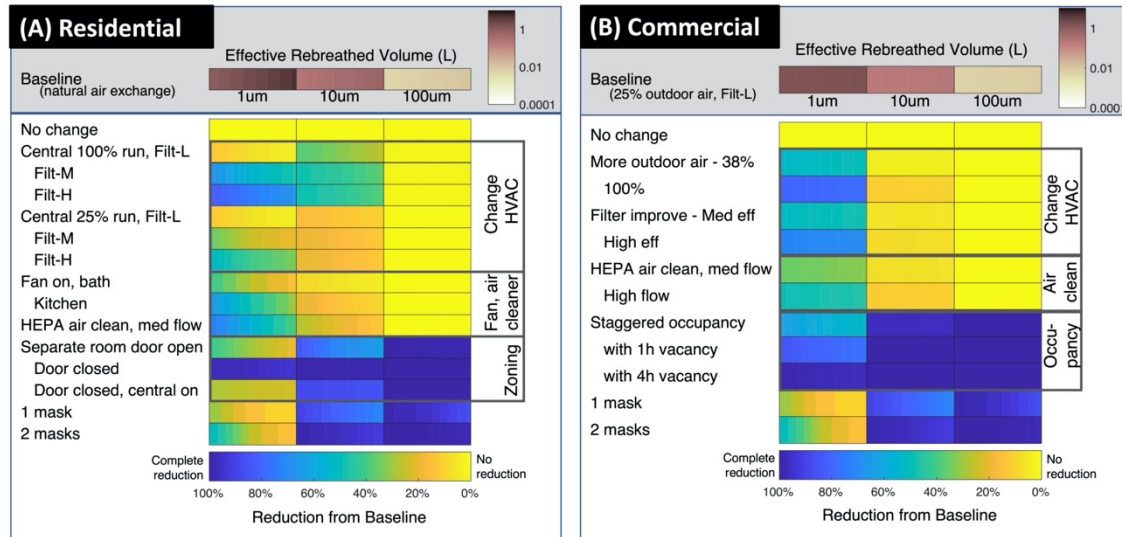

231  
 232 *Figure 3. Person-to-person ERBV for four-hour interactions in (A) residential and (B)*  
 233 *commercial settings, along with reductions due to mitigation measures. Horizontal shading in*  
 234 *the individual rectangles shows realistic variability in environment and facilities, such as*  
 235 *different floor areas (SI). Homes and commercial spaces have similar floor areas in these*  
 236 *simulations. In residential settings, “Central” means operating the central air handlers,*  
 237 *common in the United States, continuously (100%) or with a 25% runtime. Most of these*  
 238 *systems filter air but do not provide fresh air from outdoors; ventilation is provided with bath*  
 239 *and kitchen exhaust fans. The situation differs in commercial buildings, where continuously*  
 240 *operating central air handlers supply fresh outdoor air as well as filtering recirculated air.*  
 241 *“Air cleaner” refers to portable, stand-alone air cleaners with high-efficiency filtration. SI*  
 242 *contains additional details, along with 15-min and 1-h figures.*

243

244 1- $\mu\text{m}$  particles would be easily transmitted to a recipient. Likewise, the lower value  
 245 of  $\text{ERBV}_{10}$  does not indicate unimportance. Particles of 10- $\mu\text{m}$  diameter might be  
 246 transmitted less efficiently, but this size range could still contain most of the  
 247 infective particles. The importance of each particle size is different for each  
 248 pathogen, and is unknown in an emerging situation. We evaluate fractional  
 249 reductions in ERBV, which does not vary with disease.

250 The lower part of each figure shows rebreathed volume reductions by ventilation,  
 251 filtration, and occupancy or zoning measures. The lowest rows show the effect of  
 252 cloth or surgical face coverings for comparison, with uncertainty in efficiency shown  
 253 as a range of shading. For mechanical measures (ventilation and filtration),  
 254 achievable reductions depend on the fraction of time operating, flow rate compared  
 255 to room volume, and filtration efficiency. Many common filters remove particles of  
 256 10  $\mu\text{m}$  diameter and larger, with efficiencies improving at higher filter ratings;  
 257 lower-rated filters do not remove 1- $\mu\text{m}$  particles.

258  $\text{ERBV}_{100}$  is not noticeably reduced with any ventilation or filtration strategy,  
 259 because these large particles are lost by deposition more quickly than they can be



260 removed mechanically. Offsetting occupancy, wearing face coverings, and separating  
261 occupants between rooms—even with doors open— does reduce  $ERBV_{100}$ .

262  $ERBV_1$  can be reduced with many ventilation and filtration strategies. Ventilation  
263 brings fresh air into the environment, while filtration recirculates and cleans air.  
264 Reductions in  $ERBV_{10}$  by mechanical measures are intermediate between  $ERBV_1$  and  
265  $ERBV_{100}$ . Some effective mitigation measures would be neglected by assuming that  
266 1- $\mu\text{m}$  and 10- $\mu\text{m}$  particles are unresponsive to mechanical means like large, 100- $\mu\text{m}$   
267 droplets. In residences (Fig. 3A), kitchen range hoods reduce  $ERBV_1$  by 30-40% and  
268 bath fans, with about half the flow, by only 15-30%. When central-air units operate  
269 continuously with medium- or high-rated filters, reductions are 15-55%; lower  
270 operating time decreases those benefits. Separating individuals between rooms  
271 gives moderate reductions, while closing doors between them is the best protection  
272 as long as central air handlers are not operating. Offices have more closely  
273 controlled ventilation than do homes, and a narrower range of ERBV and mitigation  
274 effectiveness. Increasing the amount of outdoor air supplied and improving the filter  
275 both reduce  $ERBV_1$ , while  $ERBV_{10}$  reductions are lower because the baseline already  
276 includes some removal of 10- $\mu\text{m}$  particles. Staggered occupancy, in which one  
277 person enters after another leaves, reduces  $ERBV_1$  similar to medium-rated  
278 filtration. Vacancy periods increase the reduction.

279 Deposition loss rates are a key reason that 1- $\mu\text{m}$  and 10- $\mu\text{m}$  particles differ in  
280 baseline ERBV, and also explain differences in the ventilation effectiveness shown in  
281 Figure 3. Deposition loss rates for 10- $\mu\text{m}$  particles are similar to or greater than air  
282 exchange rates, so total removal is less influenced by intentional ventilation  
283 changes. In comparison, removal of 1- $\mu\text{m}$  particles is dominated by air exchange and  
284 easily altered by ventilation. A good understanding of indoor deposition rates  
285 therefore underlies quantification of ventilation effectiveness, but these loss rates  
286 are infrequently measured, and measured deposition is usually faster than  
287 theoretical predictions (30).

288 The difference between  $ERBV_1$ ,  $ERBV_{10}$  and  $ERBV_{100}$  offers the possibility to  
289 determine particle sizes most likely involved in transmission through retrospective  
290 analysis. For example, staggered occupancy (one four-hour shift following another)  
291 reduces  $ERBV_1$  by about 60%, but  $ERBV_{10}$  by over 99%. In an emerging disease  
292 outbreak, the infectious nature of 1- $\mu\text{m}$  versus 10- $\mu\text{m}$  particles might be elucidated  
293 by seeking situations in which an index patient infected others in the same shift, and  
294 did or did not infect others in the next shift. A similar epidemiological exploitation  
295 has been proposed earlier (31).

## 296 **Mitigation in meaningful ranges**

297 Thus far, we have presented ERBV in baseline situations and discussed methods to  
298 reduce those values. It is also essential that mitigation measures reduce the risk of  
299 infection, not just the dose, because each strategy carries some cost or  
300 inconvenience. Ideally, one would be able to calculate the baseline and mitigated

301 doses and evaluate them against a dose-response curve. In the face of a novel  
302 pathogen, neither the transmitted dose nor the dose-response curve is known, and  
303 only classical disease models can provide some guidance.

304 Dose-response curves for many viruses have similar features. Human and animal  
305 responses typically show a zero risk of infection below the minimum infectious  
306 dose, and near-certainty of infection above infectious dose 95% (ID<sub>95</sub>, also called  
307 “saturated”). If the baseline situation results in a dose below the minimum  
308 infectious value, then mitigation measures are not required. Conversely, if the  
309 baseline exceeds ID<sub>95</sub>, mitigation does not effectively reduce risk without a  
310 significant reduction in dose. Between the minimum infectious dose and ID<sub>95</sub>, dose-  
311 response curves often have a sigmoidal shape. At the point where the dose is likely  
312 to infect 50% of susceptible individuals (ID<sub>50</sub>), infection risk rises approximately  
313 linearly with the logarithm of dose. Mitigation measures are therefore effective only  
314 when applied over this responsive portion of the curve, and efficacy depends on  
315 both the baseline risk relative to ID<sub>95</sub> and the range, or width, of infectious doses  
316 spanned by the sloping portion of the infection curve. Neither the baseline risk nor  
317 the width of the dose-response curve is known in an emerging situation, and in fact  
318 is often unknown for well-studied pathogens.

319 Figure 4 illustrates risk reductions beginning with four baseline risks, where the  
320 reduction in dose (*x*-axis) corresponds to the change in ERBV. A dose-response  
321 curve with the shape found for SARS-CoV-1 (32), which is closely related to SARS-  
322 CoV-2, is used to estimate remaining risk. A wider dose-response curve, not specific  
323 to any pathogen, also appears to illustrate how risk would respond for a disease  
324 with different characteristics (Section S.9, Fig. S.5).

325 The upper portion of Figure 4 shows the reductions possible from the measures in  
326 Figure 3. Risk via ERBV<sub>1</sub> is reduced by many mechanical measures in residential  
327 situations, and most measures in commercial situations. Except for occupancy  
328 strategies, many measures do not have a large effect on risk via ERBV<sub>10</sub> in  
329 commercial settings. Ventilation strategies do reduce risk via ERBV<sub>10</sub> in residential  
330 settings. When the original risk is very high (95%) and the dose-response curve is  
331 wide, the large reductions needed to achieve meaningful reductions are not possible  
332 with any mechanical measures.

333 The dose-response relationship is not known in an emerging disease outbreak.  
334 Observations of rebreathed volume can serve as a proxy for dose during early  
335 decisions about mitigation. When ERBV is comparable to another situation in which  
336 infection has spread widely, mitigation measures that give at least order-of-  
337 magnitude reduction should be implemented. Identifying ERBV values when  
338 infection does and does not occur could suggest the width of the curve, even if  
339 uncertainty in ERBV were a factor of three (about 10<sup>0.5</sup>).

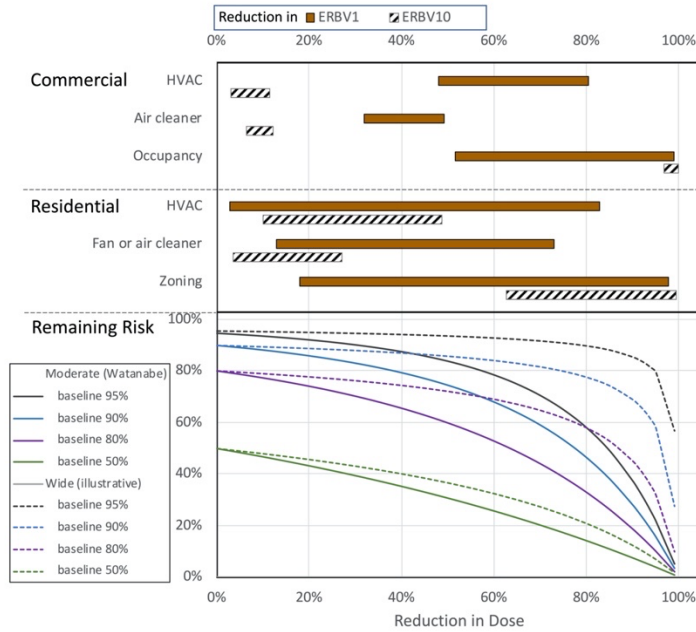

340

341 *Figure 4. Possible changes in risk associated with reductions in ERBV. Percentage reductions in*  
342 *ERBV (upper x-axis) are the same as percentage reductions in dose (lower x-axis), and can*  
343 *thus be associated with risk remaining after a specific dose reduction. Baseline risk and dose-*  
344 *response curve width are not known, and uncertainty in risk reduction is demonstrated with*  
345 *different scenarios. Labels on 'Commercial' and 'Residential' measures correspond to the*  
346 *specific measures grouped in Figure 3, and ranges for each category cover all measures and*  
347 *situations. ERBV<sub>100</sub> is not shown because most of the mitigation measures have no effect.*

348

## 349 **Practical Uses of Effective Rebreathed Volume**

350 By acknowledging that particle size is the cause of differences in transport, ERBV  
351 avoids the legacy “droplet” versus “aerosol” dichotomy. We propose that the  
352 following steps would have lessened some of the economic impact associated with  
353 the COVID-19 pandemic:

- 354 1) *Building designers* would have determined ERBV<sub>1</sub>, ERBV<sub>10</sub>, and ERBV<sub>100</sub> at the  
355 time of commissioning, providing values that quantified both normal and  
356 transmission-minimizing circumstances.
- 357 2) *Epidemiological studies* would immediately exploit known differences in ERBV<sub>1</sub>,  
358 ERBV<sub>10</sub>, and ERBV<sub>100</sub> to identify particle sizes associated with infection as soon  
359 as outbreaks emerged. They might also identify ERBV associated with saturation  
360 and approximate widths of dose-response curves. Effective interventions could  
361 then be better targeted.
- 362 3) *Facility managers* could evaluate venues, for example, comparing ERBV for  
363 different rooms or for indoor versus outdoor locations. As information emerged,

364 they would be guided in their determination with values of ERBV that were  
365 known to be saturated and safe.  
366 4) *Public health messaging* would include ERBV so that each individual could make  
367 informed choices about interactions based on relative and overall risk  
368 acceptance.

369 These types of evaluation have all been conducted casually during the COVID-19  
370 pandemic. We developed the size-dependent ERBV metric to provide rigor to such  
371 informal evaluations, to isolate the environmental component of the chain of  
372 infection, to identify limiting uncertainties like indoor deposition rates, and to  
373 provide a framework that supports rapid response in future outbreaks.

## 374 **Materials and Methods**

375 Exhaled volume is treated as a conserved tracer with losses that depend on particle  
376 size. All equations for transport of a contaminant in fluids can be used to predict the  
377 exhaled volume per volume of air. A challenge in developing comparative transport  
378 metrics has been the limited literature describing the travel of contaminants within  
379 a few meters of a source or emitter, which we call “source-proximate transport.” A  
380 contribution of this work is therefore a review of modeling approaches to estimate  
381 rebreathed volume. The models chosen are described here, and equations and  
382 further justification appear in Supporting Information.

383 The models ultimately chosen are simple, yet they capture the major factors that  
384 affect contaminant transport: distance from emitter, accumulation in confined  
385 spaces, dispersion rate, and the influence of other loss rates including mitigation  
386 measures. The simulations can therefore be used to compare expected values of  
387 rebreathing, even between very different environments such as within and outside  
388 of structures. The chosen models also do not rely on specialized inputs such as  
389 surface temperatures or roughness, or detailed interior geometries. Such  
390 requirements would preclude general recommendations and comparisons among  
391 environments.

392 Most environments are more complex than the simple representations employed  
393 here, so contaminant concentrations might vary spatially. However, stochastic  
394 variations do not invalidate comparisons between expected values of rebreathed  
395 volume, which are averaged across the entire environment. If those variations are  
396 not observable or predictable, they cannot be manipulated to reduce risk, either.

397 For outdoor interactions, we used a steady-state Gaussian plume equation (33) over  
398 a range of atmospheric stability conditions. The Gaussian plume is typically not used  
399 to describe transport over short distances, because contaminants travel in irregular  
400 packets. However, average concentration values do follow the expected shape, even  
401 2 m from the emitter (34, 35), and the distribution of concentration due to sporadic  
402 transport on short time scales can be described probabilistically (36). We therefore

403 combined the Gaussian-predicted concentrations with an intermittency  
404 enhancement (36) as a worst case. This choice is discussed in more detail in SI S.2.

405 For indoor interactions, we used a well-mixed zone model, which assumes that  
406 concentrations are the same throughout each zone. The model was cast in a matrix  
407 form (37) to simulate multiple zones, including connections through central air  
408 systems (SI S.3). Removal by filtration was applied at the inlet of the central air  
409 system. When natural infiltration dominated air exchange, we accounted for  
410 reduced effectiveness of mechanical ventilation (38). Few reports quantify  
411 deviations from the well-mixed zone assumption other than proximity effects.  
412 Variations in indoor cooking smoke concentrations can be about a factor of two  
413 from lowest to highest (39). A simulation of stochastic variations in infection rate  
414 resulting from interzonal transport gave about 40% variation (37). No evidence  
415 suggests that expected values from well-mixed simulations are biased.

416 Elevated concentrations occur near emitters indoors. We simulated indoor  
417 proximity effects with a point-release model (26), modified to represent a  
418 continuous source (27) (SI S.4), with dispersion parameters dependent on air-  
419 change rates (27). Concentrations simulated by the point-release model agreed with  
420 steady-state, well-mixed values at distances far from the emitter or when dispersion  
421 was similar to outdoor values. Figure 2B and Table 1 show worst-case rebreathing  
422 rates, when the emitter and recipient breathe at the same level.

423 We interpreted the few available measurements of the proximity effect in terms of  
424 ERBV (SI S.4) and compared them with the point-release simulations, as shown in  
425 Figure 2B. The effect of indoor proximity has been simulated with computational  
426 fluid dynamic models, but we did not find quantified source or breathing rates that  
427 would allow interpretation in terms of rebreathed volume. Computational fluid  
428 dynamic studies often examine situations with particular ventilation, furnishing, or  
429 occupancy features; they would be useful to a broader understanding of ERBV by  
430 including enough variation to allow generalization.

431 Particle removal by deposition is the reason that ERBV differs among particle sizes,  
432 and also a cause for differences in the effectiveness of mechanical mitigation  
433 measures. Selection of appropriate deposition rates thus affects all conclusions. We  
434 use the theoretical model by Lai and Nazaroff (40) to provide central values.  
435 However, measured deposition is often faster than model predictions (41),  
436 especially for particles smaller than 1  $\mu\text{m}$  and in occupied houses. Uncertainties in  
437 Fig. 2C come from observations (42, 43) and are discussed further in SI Section S.5  
438 and Table S.2.

439 We identified a range of baseline floor area and air exchange rates for residential  
440 and commercial situations (SI S.7, S.8). Air exchange rates include those  
441 recommended by the American Society of Heating, Refrigerating and Air-  
442 Conditioning Engineers (ASHRAE) (44, 45) as well as measurements. For each  
443 baseline case, each mitigation measure was applied and then the reduction in ERBV

444 was calculated to obtain the range of reduction percentages in Figure 3. Filter  
445 efficiencies are taken from ASHRAE Standard 52.2-2017 (46) with ratings as  
446 described in Supporting Information.

#### 447 **Acknowledgements**

448 Mj Riches created the artistic rendering of Figure 1. Helpful comments on the  
449 manuscript and its development came from David Dandy, Greg Hickey, Joshua  
450 Keller, Marilee Long, Steven Simske, and Ander Wilson. The author team  
451 acknowledges multidisciplinary interactions supported at Colorado State University  
452 that fostered collaborative problem-solving. **Funding:** TCB acknowledges support  
453 from Walter Scott, Jr. Presidential Chair funds. DKF was supported by the Alfred P.  
454 Sloan Foundation (G-2019-12442). **Contributions:** Conceptualization (TCB),  
455 Methodology (TCB, ABL, DKF, PWF, JRP, JMH), Validation (SHJ), Cross-disciplinary  
456 integration (KMF, SV), Writing – Original Draft (TCB, ABL, DKF, PWF); Writing –  
457 Review and editing (All). **Competing interests:** Authors declare no competing  
458 interests. **Data and materials availability:** All input data and equations are given  
459 in supporting information.

#### 460 **References**

- 461 1. C. Makridis, J. Hartley, The Cost of Covid-19: A Rough Estimate of the 2020 US  
462 GDP Impact. *Spec. Ed. Policy Br.* (2020).
- 463 2. M. Gandhi, D. S. Yokoe, D. V Havlir, Asymptomatic Transmission, the Achilles'  
464 Heel of Current Strategies to Control Covid-19. *N. Engl. J. Med.* **382**, 2158–  
465 2160 (2020).
- 466 3. X. He, *et al.*, Temporal dynamics in viral shedding and transmissibility of  
467 COVID-19. *Nat. Med.* **26**, 672–675 (2020).
- 468 4. S. S. Morse, *et al.*, Prediction and prevention of the next pandemic zoonosis.  
469 *Lancet* **380**, 1956–1965 (2012).
- 470 5. W. Dawson, *et al.*, Global hotspots and correlates of alien species richness  
471 across taxonomic groups. *Nat. Ecol. Evol.* **1**, 186 (2017).
- 472 6. F. Keesing, *et al.*, Impacts of biodiversity on the emergence and transmission  
473 of infectious diseases. *Nature* **468**, 647–652 (2010).
- 474 7. Centers for Disease Control and Prevention, Principles of epidemiology in  
475 public health practice: an introduction to applied epidemiology and  
476 biostatistics (2006).
- 477 8. E. C. Riley, G. Murphy, R. L. Riley, Airborne spread of measles in a suburban  
478 elementary school. *Am. J. Epidemiol.* **107**, 421–432 (1978).

- 479 9. W. W. Nazaroff, Inhalation intake fraction of pollutants from episodic indoor  
480 emissions. *Build. Environ.* **43**, 269–277 (2008).
- 481 10. S. N. Rudnick, D. K. Milton, Risk of indoor airborne infection transmission  
482 estimated from carbon dioxide concentration. *Indoor Air* **13**, 237–245 (2003).
- 483 11. J. Siegel, E. Rhinehart, M. Jackson, L. Chiarello, “2007 Guideline for Isolation  
484 Precautions: Preventing Transmission of Infectious Agents in Healthcare  
485 Settings (updated July 2019)” (2007).
- 486 12. R. Tellier, Y. Li, B. J. Cowling, J. W. Tang, Recognition of aerosol transmission of  
487 infectious agents: a commentary. *BMC Infect. Dis.* **19**, 101 (2019).
- 488 13. H. Qian, *et al.*, Indoor transmission of SARS-CoV-2. *medRxiv* (2020).
- 489 14. W. Chen, N. Zhang, J. Wei, H. L. Yen, Y. Li, Short-range airborne route  
490 dominates exposure of respiratory infection during close contact. *Build.*  
491 *Environ.* (2020) <https://doi.org/10.1016/j.buildenv.2020.106859>.
- 492 15. I. T. S. Yu, *et al.*, Evidence of airborne transmission of the severe acute  
493 respiratory syndrome virus. *N. Engl. J. Med.* **350**, 1731–1739 (2004).
- 494 16. J. Gralton, E. Tovey, M.-L. McLaws, W. D. Rawlinson, The role of particle size in  
495 aerosolised pathogen transmission: A review. *J. Infect.* **62**, 1–13 (2011).
- 496 17. R. J. Thomas, Particle size and pathogenicity in the respiratory tract. *Virulence*  
497 **4**, 847–858 (2013).
- 498 18. S. Asadi, *et al.*, Aerosol emission and superemission during human speech  
499 increase with voice loudness. *Sci. Rep.* **9**, 1–10 (2019).
- 500 19. G. R. Johnson, *et al.*, Modality of human expired aerosol size distributions. *J.*  
501 *Aerosol Sci.* **42**, 839–851 (2011).
- 502 20. B. Bake, P. Larsson, G. Ljungkvist, E. Ljungström, A.-C. Olin, Exhaled particles  
503 and small airways. *Respir. Res.* **20**, 8 (2019).
- 504 21. X. Xie, Y. Li, A. T. Y. Chwang, P. L. Ho, W. H. Seto, How far droplets can move in  
505 indoor environments – revisiting the Wells evaporation–falling curve. *Indoor*  
506 *Air* **17**, 211–225 (2007).
- 507 22. E. P. Vejerano, L. C. Marr, Physico-chemical characteristics of evaporating  
508 respiratory fluid droplets. *J. R. Soc. Interface* **15**, 20170939 (2018).
- 509 23. S. P. Humphrey, R. T. Williamson, A review of saliva: Normal composition,  
510 flow, and function. *J. Prosthet. Dent.* **85**, 162–169 (2001).
- 511 24. C. He, L. Morawska, J. Hitchins, D. Gilbert, Contribution from indoor sources to

- 512 particle number and mass concentrations in residential houses. *Atmos.*  
513 *Environ.* **38**, 3405–3415 (2004).
- 514 25. S. L. Miller, W. W. Nazaroff, Environmental tobacco smoke particles in  
515 multizone indoor environments. *Atmos. Environ.* **35**, 2053–2067 (2001).
- 516 26. P. J. Drivas, P. A. Valberg, B. L. Murphy, R. Wilson, Modeling Indoor Air  
517 Exposure from Short-Term Point Source Releases. *Indoor Air* **6**, 271–277  
518 (1996).
- 519 27. K.-C. Cheng, *et al.*, Modeling Exposure Close to Air Pollution Sources in  
520 Naturally Ventilated Residences: Association of Turbulent Diffusion  
521 Coefficient with Air Change Rate. *Environ. Sci. Technol.* **45**, 4016–4022 (2011).
- 522 28. L. Liu, Y. Li, P. V. Nielsen, J. Wei, R. L. Jensen, Short-range airborne  
523 transmission of expiratory droplets between two people. *Indoor Air* **27**, 452–  
524 462 (2017).
- 525 29. D. Licina, Y. Tian, W. W. Nazaroff, Inhalation intake fraction of particulate  
526 matter from localized indoor emissions. *Build. Environ.* **123**, 14–22 (2017).
- 527 30. V. W. Or, *et al.*, Glass surface evolution following gas adsorption and particle  
528 deposition from indoor cooking events as probed by microspectroscopic  
529 analysis. *Environ. Sci. Process. Impacts* (2020).
- 530 31. N. I. Stilianakis, Y. Drossinos, Dynamics of infectious disease transmission by  
531 inhalable respiratory droplets. *J. R. Soc. Interface* **7**, 1355–1366 (2010).
- 532 32. T. Watanabe, T. A. Bartrand, M. H. Weir, T. Omura, C. N. Haas, Development of  
533 a dose-response model for SARS coronavirus. *Risk Anal. An Int. J.* **30**, 1129–  
534 1138 (2010).
- 535 33. S. R. Hanna, G. A. Briggs, R. P. Hosker Jr, *Handbook on atmospheric diffusion*  
536 (National Oceanic and Atmospheric Administration, 1982).
- 537 34. A. Celani, E. Villermaux, M. Vergassola, Odor Landscapes in Turbulent  
538 Environments. *Phys. Rev. X* **4**, 41015 (2014).
- 539 35. J. A. Farrell, J. Murlis, X. Long, W. Li, R. T. Cardé, Filament-based atmospheric  
540 dispersion model to achieve short time-scale structure of odor plumes.  
541 *Environ. fluid Mech.* **2**, 143–169 (2002).
- 542 36. J. Murlis, C. D. Jones, Fine-scale structure of odour plumes in relation to insect  
543 orientation to distant pheromone and other attractant sources. *Physiol.*  
544 *Entomol.* **6**, 71–86 (1981).
- 545 37. C. J. Noakes, P. A. Sleight, Mathematical models for assessing the role of airflow



- 546 on the risk of airborne infection in hospital wards. *J. R. Soc. Interface* **6**, S791–  
547 S800 (2009).
- 548 38. L. Palmiter, T. Bond, Interaction of mechanical systems and natural infiltration  
549 in *Proc. 12th AIVC Conference, Ottawa, Canada*, (1991), pp. 285–295.
- 550 39. M. Ezzati, H. Saleh, D. M. Kammen, The contributions of emissions and spatial  
551 microenvironments to exposure to indoor air pollution from biomass  
552 combustion in Kenya. *Environ. Health Perspect.* **108**, 833–839 (2000).
- 553 40. A. C. K. Lai, W. W. Nazaroff, Modeling Indoor Particle Deposition from  
554 Turbulent Flow onto Smooth Surfaces. *J. Aerosol Sci.* **31**, 463–476 (2000).
- 555 41. C. Howard-Reed, L. A. Wallace, S. J. Emmerich, Effect of ventilation systems  
556 and air filters on decay rates of particles produced by indoor sources in an  
557 occupied townhouse. *Atmos. Environ.* **37**, 5295–5306 (2003).
- 558 42. T. L. Thatcher, D. W. Layton, Deposition, resuspension, and penetration of  
559 particles within a residence. *Atmos. Environ.* **29**, 1487–1497 (1995).
- 560 43. A. C. K. Lai, Particle deposition indoors: a review. *Indoor Air* **12**, 211–214  
561 (2002).
- 562 44. ASHRAE, “ANSI/ASHRAE standard 62.2-2019: Ventilation and Acceptable  
563 Indoor Air Quality in Residential Buildings” (2019).
- 564 45. ASHRAE, “ANSI/ASHRAE Standard 62.1-2019: Ventilation for Acceptable  
565 Indoor Air Quality” (2019).
- 566 46. ASHRAE, “ANSI/ASHRAE standard 52.2-2017: Method of Testing General  
567 Ventilation Air-Cleaning Devices for Removal Efficiency by Particle Size”  
568 (American Society of Heating Refrigerating and Air-Conditioning Engineers,  
569 2017).

570

## Supporting Information

### Quantifying proximity, confinement, and interventions in disease outbreaks: a decision support framework for air-transported pathogens

Tami C. Bond, Angela Bosco-Lauth, Delphine K. Farmer, Paul W. Francisco, Jeffrey R. Pierce, Kristen M. Fedak, Jay M. Ham, Shantanu H. Jathar, Sue VandeWoude

|                                                                                    |    |
|------------------------------------------------------------------------------------|----|
| Supplementary Text                                                                 | 2  |
| S.1 RBV calculations                                                               | 2  |
| S.2 RBV outdoors, from plume equations                                             | 3  |
| S.3 Well-mixed indoor environments                                                 | 4  |
| S.4 Indoor point-release model                                                     | 6  |
| S.5 Size-dependent deposition losses                                               | 7  |
| S.6 Particle removal by face coverings                                             | 9  |
| S.7 Residential situations                                                         | 9  |
| S.8 Commercial situations                                                          | 10 |
| S.9. Influence of baseline dose on effectiveness of mitigation measures            | 11 |
| S.10. Chain of infection, rebreathed volume, and the Wells-Riley equation          | 11 |
| S.10.1. Particle size dependence                                                   | 13 |
| S.10.2 Probability of infection, mean infection rate, and accumulated interactions | 13 |
| S.10.3 RBV versus rebreathed fraction                                              | 14 |
| S.10.4 RBV versus intake fraction                                                  | 14 |
| S.11. Influence of deposition loss on effectiveness of mitigation measures         | 14 |
| Figures                                                                            | 16 |
| Figure S1. Comparison between indoor and outdoor proximity effects.                | 16 |
| Figure S.2. Rebreathing rates simulated by the indoor point-release model.         | 17 |
| Figure S.3. Baseline ERBV and mitigation cases for the residential case.           | 18 |
| Figure S.4. Baseline ERBV and mitigation cases for the commercial case.            | 19 |
| Figure S.5. Illustrative dose-response curves with two widths.                     | 20 |
| Figure S.6. Ventilation efficiency for a range of deposition velocities.           | 21 |
| Tables                                                                             | 22 |
| Table S.1. Inputs to indoor point-release simulations.                             | 22 |

|                                                                                                                    |    |
|--------------------------------------------------------------------------------------------------------------------|----|
| Table S.2. Deposition velocities                                                                                   | 22 |
| Table S.3. Residential baseline values                                                                             | 23 |
| Table S.4. Residential mitigation cases.                                                                           | 24 |
| Table S.5. Commercial baseline values                                                                              | 26 |
| Table S.6. Commercial mitigation cases.                                                                            | 27 |
| Table S.7. Terms in Wells-Riley equation for mean infection rate and their relationship to the chain of infection. | 29 |

## Supplementary Text

### *S.1 RBV calculations*

Methods of calculating rebreathed volume (RBV) are described first (Sections S.1-S.4). Then, modifications that account for deposition losses are discussed (Section S.5).

Exhaled volume is treated as a conserved tracer ( $B_{ex}$  in the equations that follow). All equations for transport of a contaminant in fluids can be used to predict the exhaled volume per volume of air ( $b_{ex}$ ) as a function of location and time:  $b_{ex}(t, x)$ . Although exhaled volume can be modeled in three dimensions, only a single spatial coordinate is used in the following discussion for simplicity.

The recipient breathes at a rate  $p$ , and the volume of formerly exhaled air that is inhaled by the recipient during an infinitesimal time  $dt$  is  $p b_{ex}(t, x) dt$ . Total rebreathed volume during residence time  $\Delta t$  is thus

$$\int_0^{\Delta t} p \cdot b_{ex}(x, t) dt \quad (S.1)$$

Units of volume per volume for  $b_{ex}$  can be difficult to conceptualize and the dimensionless quantity  $b_{ex}$  might allow human errors during the creation of a new model. One alternative is modeling a mass concentration, which has a fixed value  $C_{ex}$  ( $\text{kg}/\text{m}^3$ ) in the emitter's exhaled air. The inhaled total mass can then be divided by  $C_{ex}$  to obtain the rebreathed volume.

We use a value of  $8 \text{ L min}^{-1}$  for the human breathing rate,  $p$ . This value is common throughout exposure literature (1). This value is greater than the "minute ventilation" used in the medical field (typically  $6 \text{ L min}^{-1}$ ), which is a resting rate that does not include activity.

Some studies report steady-state (unchanging) concentration values ( $c_{ss}(x)$ ) that result from a constant emission rate, or source,  $S$ . The ratio  $c_{ss}(x)/S$  at any location is a transport function with units of  $\text{s m}^{-3}$ , which quantifies the response of

concentration to a unit increase in source strength, assuming that loss processes are linear in concentration. Rebreathed volume during time  $\Delta t$  is

$$RBV(x, \tau) = p^2 \Delta t \frac{c_{ss}(x)}{S} \quad (\text{S.2})$$

where one of the  $p$  values accounts for exhalation by the emitter (the source) and one for inhalation by the recipient. The ratio  $c_{ss}/S$  allows the use of measured, modeled, and analytically predicted concentrations. Concentrations could also be simulated with computational fluid dynamic models, as suggested by *Sze To and Chao* (2). When concentration is changing rather than steady, the calculation of RBV requires an integral formulation.

## ***S.2 RBV outdoors, from plume equations***

For outdoor plumes, concentration values at any distance downwind follow a normal probability distribution, with the peak directly downwind from the emitter. Dispersion is described by plume widths that increase with distance, depend on atmospheric stability, and are fit to time-averaged, measured data (3, 4). The standard steady-state Gaussian plume equation is (3):

$$\frac{c_{ss}(x,y)}{S} = \frac{1}{2\pi\sigma_y(x)\sigma_z(x)u} e^{-\left(\frac{y^2}{2\sigma_y(x)^2}\right)} \quad (\text{S.3})$$

In this equation,  $x$  is the downwind distance of the recipient, and the dependence on downwind distance is expressed by  $\sigma_y(x)$  and  $\sigma_z(x)$ , which can be thought of as plume widths.  $y$  is the crosswind distance, and emitter and recipient are assumed to be at the same height for the most conservative case. When the recipient is directly downwind, the exponential term becomes unity.

Literature on parameterizing  $\sigma_y$  and  $\sigma_z$  under different atmospheric conditions is extensive. In stable conditions, there is less dispersion,  $\sigma$ -values are smaller, and concentration is greater. We use the  $\sigma$ -values recommended by Briggs, fit to curves known as the Pasquill-Gifford method, as tabulated by Hanna (3). Plume concentrations were calculated for each distance over the entire stability range (classes A through F) for urban conditions and for most open-country conditions. "Open-country" dispersion differs because surface obstacles are not as high and turbulence is relatively lower. We excluded open-country slightly- and moderately-stable conditions (classes E and F), reasoning that the emitter and recipient themselves would enhance the turbulence. We also explored other dispersion relationships (5) as a function of boundary-layer height and vertical velocity; these gave rebreathed volume values in the same order of magnitude.

There is a concern about using Gaussian plume models to describe transport over distances of only a few meters. Values of  $\sigma_y$  and  $\sigma_z$  are generally provided for distances of 100-10,000 meters downwind of the emission source. The term "near-

source,” in dispersion literature, is associated with distances of 50-100 m. We found very little support for estimating what we have come to call “source-proximate” dispersion: transport occurring over distances of less than 10 m, relevant to person-to-person transport and to exposures of individuals very near a hazardous material release. Contaminants travel in irregular packets, so the normal or Gaussian shape is found only after averaging (6, 7), typically over several minutes; the Gaussian plume is usually applied more than 50 m from emitters. However, average concentration values do follow a standard plume shape (8, 9), and the concentrations resulting from sporadic transport can be described probabilistically (10). We found only one data set of source-proximate concentrations measured by Jones, at 2, 5 and 15 m downwind (7). Average values of  $c_{ss}/S$  at 2 m were  $0.26 \text{ s m}^{-3}$ , or  $0.65 \text{ s m}^{-3}$  when adjusted for electrostatic effects that affect those particular measurements. These values lie in the range for plumes that are neutral or slightly unstable, extrapolating the Briggs fits for  $\sigma$  back to 2 m. Furthermore, dispersion principles are the basis for modeling plumes as a series of filaments for odor transmission in the source-proximate range (9), and those simulation results compare well with the Jones measurements. We conclude that standard plume equations can be used to estimate source-proximate concentrations, with caution. The proximity curves in Figure 2 use the classical plume equations for a receptor directly downwind.

The Gaussian shape of the plume cross-section emerges only after averaging over several minutes. The recipient might intercept whiffs, or plume tendrils higher than the average concentration, over short time scales. We estimated an “intermittency factor:” an increase in the average concentration if the recipient were to encounter *only* the whiffs. Based on the data of Murlis and Jones (10), this increase is about a factor of five, as the transported material is observed only about 15-20% of the time. This factor is quite conservative as these observations are made with time resolution of less than 1 s. The intermittency factor would decrease rapidly with averaging time and disappear after about 20 minutes (11).

For wind speed,  $2.5 \text{ m s}^{-1}$  ( $5.6 \text{ mi h}^{-1}$ ) at 2 m height is roughly  $3.3 \text{ m s}^{-1}$  ( $7.5 \text{ mi h}^{-1}$ ) is similar to the annual-mean 10 m wind speed in many cities (<https://www.currentresults.com/Weather/US/wind-speed-city-annual.php>). When all other factors are equal, outdoor ERBV is inversely proportional to wind speed, so the estimates in Fig 2 may be scaled to different wind speeds using  $(2.5 \text{ m s}^{-1}) u^{-1}$ , where  $u$  is the wind speed in  $\text{m s}^{-1}$ .

### ***S.3 Well-mixed indoor environments***

A balance equation for the total exhaled air which is introduced by a human breathing, mixed instantly into a box volume  $V$ , and carried out by air exiting the volume at a rate  $Q$ , is given by:

$$\frac{dB_{ex}(t)}{dt} = p(t) - \frac{Q}{V} B_{ex}(t) = p(t) - \alpha B_{ex}(t) \quad (\text{S.4})$$

In indoor air quality literature, the ratio  $Q/V$  is known as an air change rate, with units of inverse time, and is often given the symbol  $\alpha$ , as shown in the rightmost representation. Other first-order loss rates, such as deposition (Section S.5), can be added into the final term in the equation.

The relationship for exhaled volume per volume of air ( $b_{ex}$ ) can be expressed by dividing by the room volume,  $V$ . Balance equations, and their use in modeling indoor environments, have been discussed extensively in the literature, and analytic solutions are not repeated here. Of particular note are solutions for accumulating breath (12), for differing occupancy time of emitter and recipient (1) and for accounting for filtration and personal protective equipment (13, 14).

When multiple, well-mixed zones are connected, the equation for  $B_{ex}$  in each zone  $i$  is (15):

$$\frac{dB_{ex,i}(t)}{dt} = p_i(t) + \sum_j \left( -\frac{Q_{ji}}{V_i} B_{ex,i}(t) + \frac{Q_{ij}}{V_j} B_{ex,j}(t) \right) \quad (\text{S.5})$$

where  $Q_{ij}$  is the flow from zone  $j$  to zone  $i$ . In matrix form, each element of vectors  $\vec{B}_{ex}$  and  $\vec{p}$  corresponds to a zone:

$$\frac{d\vec{B}_{ex}(t)}{dt} = \vec{p}(t) + \hat{Q}\hat{V}^{-1}\vec{B}_{ex}(t) \quad (\text{S.6})$$

The square flow matrix  $\hat{Q}$  consists of off-diagonal, positive flow elements  $Q_{ij}$  from zone  $j$  (columns) into zone  $i$  (rows). The diagonal elements  $Q_{i,i}$  are negative, representing the total flow out of zone  $i$ . Off-diagonal elements in each row or column must sum to the diagonal element, assuming incompressible flow. The volume matrix  $\hat{V}$  is diagonal only and contains the volumes of each zone. One zone can have a zero concentration and infinite volume to represent the outdoors.

The matrix formulation was coded in MatLab for this work. Other multi-zone models exist, notably CONTAM (16); our representation relies on specifying interzonal flows rather than changing them due to pressures. and enabled the setup of several similar situations with the same mitigation measures. Central air handlers were represented as separate zones to simulate multiple inlets and outlets to and from the same conditioning system. Filtration was represented as a fractional removal at the inlet to the air handler.

The formulation specifies flows between zones or between indoors and outdoors. An inherent assumption is that flows added to each zone do not affect pressures enough to alter other interzonal flows. This assumption is safe when the added supply and return flows are balanced, or when all fresh air is mechanically driven, as is the case in many commercial situations. The assumption is not true in many residences, where the baseline airflow between indoors and outdoors is caused by pressure gradients driven by natural temperature differences and wind. When

mechanical flow  $Q_{mech}$  is imposed under these conditions, the added flow  $Q_{add}$  also depends on the natural ventilation rate  $Q_{nat}$  (17):

$$Q_{add} = \frac{1}{2}Q_{mech}, \quad Q_{mech} \leq 2Q_{nat} \quad (S.7a)$$

$$Q_{add} = Q_{mech} - Q_{nat}, \quad Q_{mech} > 2Q_{nat} \quad (S.7b)$$

#### ***S.4 Indoor point-release model***

Releases in indoor environments do not immediately mix into the room, so both proximity and confinement effects exist. We simulated indoor dispersion and proximity effects with a point-release model as described in Materials and Methods; additional detail and justification is provided here. The point-release model accounts for the influence of walls using an infinite series of mirror-image sources; this series was calculated until it converged. The use of image sources probably overestimates the retention in air of particles that deposit to surfaces, but we used the model mainly to estimate proximity effects near the emitter, where most of the concentration is due to the original plume and not the reflected plumes.

We simulated a range of room sizes, air change rates, and emitter locations for 1 $\mu$ m, 10 $\mu$ m, and 100  $\mu$ m particles, as summarized in Table S.1 (27 simulations for each particle size). Dispersion parameters depended on ventilation rates as derived from measurements by Cheng *et al.* in still rooms (18). The proximity effect was greatest when dispersion was slowest, when the emitter was near a wall, and when the room was small. In real situations, dispersion is probably more rapid than the still-room situations shown here, so the proximity effect would be lower. Ranges of rebreathing from all the simulations are summarized and compared with simple indoor and outdoor models in Figure 2 (1  $\mu$ m) and S1 (10  $\mu$ m and 100  $\mu$ m). The rebreathing rates shown are taken at the same height as the emitter, and thus represent the worst case at each distance.

To illustrate the interaction between proximity and confinement further, Figure S.2 shows the modeled rate of rebreathing as a function of residence time and distance from the emitter for a single room size (6m x 6m) and ventilation rate (0.3 ac h<sup>-1</sup>). The gradient from left to right at less than 1 m distance shows the proximity effect; the gradient from top to bottom at 3 m distance shows the confinement effect; and the contours show the presence of both proximity and confinement effects near the emitter.

The simple point-release model does not capture all air currents and, hence, concentration variations caused by human figures, ventilation flows, and furnishings. Computational fluid dynamic models are more suited to simulate those details. We use simplified models to cover a range of conditions, to increase the generality of conclusions.

We compare our range of breathing rates with those of two studies designed to estimate the proximity effect indoors. Neither of those studies gave RBV, and our interpretation from their results is described here. Licina *et al.* (19) measured intake fraction for particle releases at different locations around a thermal manikin in a test chamber. The release occurred over 10 minutes, after which the source was turned off, so only the 10-minute concentrations are comparable to the point-release simulations. This study provided a total intake fraction for all 10 minutes. To translate this value to an instantaneous rebreathing rate for Figure 2B, we used our well-mixed room model to determine the ratio between  $ERBV_1$  for time 9-10 min, and  $ERBV_1$  for time 0-10 min, and applied this to the published 10-minute intake fraction. We used only those measurements with the release 1 m from the manikin, at different heights, but not at the floor. See Section S.10.4 for relationship between ERBV and intake fraction.

Liu *et al.* (20) explored indoor proximity effects using measurements of  $NO_2$ . They defined an exposure index as the ratio between the concentrations at a particular point and that averaged throughout the room. We used our well-mixed model to determine steady-state RBV per minute, and multiplied it by the maximum exposure index reported at each distance from the emitter (Fig. 5 in Liu *et al.*). Like the results of the point-source model, the data points representing the Liu study in Fig. 2 are the worst case. Liu *et al.* (20) also used computational fluid dynamic simulations to explore the transport of different particle sizes, but did not provide enough information to calculate ERBV. We encourage future studies to provide quantitative values of source strengths and concentrations, from which ERBV can be interpreted.

### ***S.5 Size-dependent deposition losses***

RBV differs from ERBV by accounting for size-dependent losses due to particle deposition and removal strategies. In this section, we summarize deposition loss rates that modify the outdoor and indoor values of RBV.

Particle deposition, or attachment of particles to surfaces, combines several processes that depend on particle size:

- (1) gravitational settling, or direct interaction between a particle and surface due to gravitational forces
- (2) impaction, or direct interaction between a particle and surface driven by turbulent air flows that enable the particle to contact the surface
- (3) interception, or indirect interactions in which turbulent air flows bring a particle close to a surface, enabling particle removal, and
- (4) Brownian diffusion, in which particle interactions with a surface are driven by random motion of the particle in air.

The magnitude of each loss rate depends on particle size. Particles below 0.1  $\mu\text{m}$  in diameter are dominated by Brownian diffusion losses, while the loss of particles above 10-  $\mu\text{m}$  diameter is dominated by gravitational settling. The total deposition



loss rate is a combination of these factors, and is often described by a parameter known as deposition velocity  $v_d$ :

$$\frac{dm(t)}{dt} = m(t) \cdot \frac{v_d A}{V} \quad (\text{S.8})$$

where  $m$  is the mass of particles of a certain size,  $A$  is the area to which they deposit, and  $V$  is the volume from which they are lost. The quantity  $(V/A)$  is the effective height ( $h_{eff}$ ) of the volume; the ratio  $v_d / h_{eff}$  is a loss rate that has units of inverse time; and the product  $(v_d A)$  can be treated as a volume flow exiting the space. These terms are included in the mass balance equations.

Table S.2 summarizes deposition velocities used in calculation. Outdoor values of  $v_d$  are the gravitational settling velocity, assuming a density of  $1 \text{ g cm}^{-3}$  for particles that are mostly water. The fraction lost is estimated in the plume model as:

$$\frac{dm(x)}{dx} = \frac{-v_d x}{h_{eff} u} \quad (\text{S.9})$$

We assumed an effective height of 1.5 m, the approximate mouth height. Deposition losses over source-proximate distances are small; even for 10- $\mu\text{m}$  particles, less than 0.2% of particles are lost.

Deposition velocities in the indoor environment have been parameterized theoretically (21), modeled with computational fluid dynamics (22) and measured (23, 24). The theoretical model by Lai and Nazaroff (21) is well-established in the indoor air literature, and its predictions are used as central values. Measured deposition is often faster (i.e. a larger deposition velocity) than model predictions, especially for particles smaller than  $1 \mu\text{m}$  and in occupied houses (25). The assumption of deposition to upward-facing surfaces only is likely acceptable for 10- $\mu\text{m}$  and greater particles, but not for  $1\text{-}\mu\text{m}$  and smaller particles.

Table S.2 summarizes uncertainties in deposition velocity based on observations (26, 27) and measurements from the HOMEChem experiment. Computational fluid dynamic models have simulated lower values (22), which are not included in the uncertainty ranges because they do not improve agreement with measured values.

Indoor deposition velocities are similar for particles of  $0.1 \mu\text{m}$  and  $1 \mu\text{m}$ . Although the  $0.1\text{-}\mu\text{m}$  particles settle more slowly than  $1\text{-}\mu\text{m}$  particles, they have greater losses by Brownian motion. For this reason, we do not report  $0.1\text{-}\mu\text{m}$  particles separately in the mitigation measures; the calculation of rebreathed volume would be nearly identical. Unlike outdoor deposition losses, indoor losses over the period of confinement are significant, equal to or greater than typical ventilation rates, as shown in Table S.2. For  $10\text{-}\mu\text{m}$  particles, these losses are particularly important in determining indoor concentrations. The effect of deposition uncertainties on indoor rebreathing rates is shown in Fig 2C in the main text and further discussed in Section S.11.

## ***S.6 Particle removal by face coverings***

Reduction of ERBV by face coverings (masks) is included in Figure 3 for comparison with other mitigation measures. Mask efficiency ranges are estimates for the wide variety of face coverings in public use. Low-cost mask testing is becoming widespread (28) but counts particles rather than assessing removal of different particle sizes. Official mask-testing protocols recommend measurement of particles at 0.3  $\mu\text{m}$ . For 1- $\mu\text{m}$  particles, we used the tabulated range of efficiencies from a laboratory that maintained an active and on-line database of tests at 0.3- $\mu\text{m}$  size, covering many common materials (29). In our figures, the range of particle penetration for a single mask was 70-95%. Impaction and other mechanisms should stop many 10- $\mu\text{m}$  particles, but they can escape by leaking around the material of an unsealed mask. Oberg and Brosseau (30) reported surgical mask penetration of less than 1% to 67% for 3.1- $\mu\text{m}$  particles, with most of the penetration values below 1%. For 10- $\mu\text{m}$  particles, we used penetration values of 1-30% to account for cloth masks and poor fits. We found no data for 100- $\mu\text{m}$  particles and used penetration of 1%-10%; the highest value accounts for possible breakup of very large particles through the mask. This range probably overestimates penetration but does not affect any of the comparisons.

## ***S.7 Residential situations***

Inputs for residential simulations are summarized in Table S.3. In the baseline residential case, we assume that the central air handler does not operate, corresponding to mild weather conditions. We also assume that bathroom and kitchen fans are not used continuously.

The floor area covers the most common housing sizes in the United States, representing approximately two-thirds of the U.S. housing stock (31). The ceiling height is a typical height for U.S. residences. If a portion of the home were closed off, the smaller end of floor area and volume, associated with higher ERBV would be appropriate. However, people who might be concerned with infecting each other are most likely to interact in rooms whose connectivity comprises a large fraction of the home, such as a connected living room, kitchen, and dining room.

Recommended ventilation depends on the number of occupants and the floor area of the home. In the most recent guidance, the lowest air flow normalized by volume corresponds to an air-change rate of about 0.3  $\text{ac h}^{-1}$  (32), and we use this as a central value.

Air change rates vary widely throughout the housing stock. Characterization of leakiness is often reported as “ACH50”, or flow at 50 Pascals of depressurization by a blower door fan normalized by the volume of the conditioned space. The pressure under testing conditions is much greater than naturally-occurring pressure differences; the measured flow must therefore be adjusted to natural conditions. This adjustment depends on factors such as climate and house height, but a common

rule of thumb is dividing ACH50 by 20 to obtain air-change rates under normal conditions (33). A database for the United States (34, 35) found that 3% of homes had ACH50 below 2, corresponding to a natural air-change rate of about  $0.1 \text{ ac h}^{-1}$ , and we use this value as the lower end of the range. Average ACH50 for homes participating in weatherization programs, and hence older, have been reported as around 20 (36), corresponding to about  $1 \text{ ac h}^{-1}$  under natural conditions, and we use this value as the upper end of the range. The range ( $0.1\text{-}1 \text{ ac h}^{-1}$ ) spans about a factor of three below and above the ASHRAE 2019 target. Values above  $1 \text{ ac h}^{-1}$  in normally-ventilated spaces are not supported by observations in the United States. Estimating air-change rates with tabulations of ACH50, without adjustment, would greatly overestimate ventilation.

Table S.4 summarizes mitigation measures for residential cases and provides justification. The “Label” column and order corresponds to the labeling in Figure 3. The “Description” column gives fan or air handler flows and filter ratings. Filter ratings are reported according to the Minimum Efficiency Reporting Value (MERV) from ASHRAE Standard 52.2-2017 (37). We used central values of particle removal for each rating. MERV ratings cover three particle sizes:  $0.3\text{-}1.0 \mu\text{m}$ ,  $1.0\text{-}3.0 \mu\text{m}$ , and  $3.0\text{-}10 \mu\text{m}$ . The  $1.0\text{-}3.0 \mu\text{m}$  range is more representative of removal efficiency at  $1 \mu\text{m}$  (38), and we use that range for  $1\text{-}\mu\text{m}$  particles.

### ***S.8 Commercial situations***

Inputs for the commercial baseline simulations are summarized in Table S.5. Central air handlers often run continuously to provide fresh air, unlike in residential situations. The floor area is an open office arrangement, chosen to be similar in size to the residential situation. While there is no requirement in the United States for square footage per person, several real estate websites indicate that open office areas should provide about  $100 \text{ ft}^2$  ( $10 \text{ m}^2$ ) per person, so this area would house about 20 people. Conditioning systems for this floor area would be sized at about “4 tons” or about 14 kW, and the total airflow for this size would be about 1600 cfm.

A common conditioning and ventilating approach for commercial buildings is to recirculate most of the building air through a system located on the roof (“rooftop unit”), and to introduce fresh air from outdoors (“outdoor air”) into this rooftop unit. Thus, more air is supplied to the conditioned space than is withdrawn from it, and the flow is balanced when building air exits through cracks. The baseline is the minimum required by ASHRAE Standard 62.1-2019 (39). The filter rating of MERV 8 is also the minimum required by ASHRAE 62.1-2019. Because the baseline commercial case has some outdoor ventilation air and some filtration, mitigation strategies that appear identical have different reductions than they do in residential situations.

Table S.6 summarizes mitigation measures for commercial cases, with the “Label” column corresponding to the labeling in Figure 3. The “Description” column provides fan or air handler flows and filter ratings.

### ***S9. Influence of baseline dose on effectiveness of mitigation measures***

Decreasing ERBV and hence dose of infectious particles cannot alter risk below the minimum effective dose. Above the dose where 95% or more of individuals are infected ( $ID_{95}$ ), moderate reductions do not decrease risk either. Further, risk of infection approximately responds to the logarithm of dose between those points. We use two illustrative dose-response curves to demonstrate how the starting point (baseline dose and risk) and the slope of the dose-response curve affect expected risk reductions.

We use the summary of Watanabe *et al.* (40), who synthesized several studies on SARS-CoV-1, to provide illustrative dose-response curves. SARS-CoV-2 is similar to SARS-CoV-1, but we do not assume that the two viruses have the same dose-response curve. We use only features of the curve's shape to explore how mitigation measures might reduce risk. Watanabe *et al.* (40) explored both exponential and beta-Poisson distributions to fit observed risk of infection. They recommended the exponential distribution because the latter, more complex distribution did not have a statistically better fit to the data. However, the exponential distribution has a fixed width in log-space, so for this exploration we used the beta-Poisson distribution.

We created two distributions with identical values of  $ID_{50}$ , but different widths (Fig. S.5). The narrower curve ("moderate" in Fig. 4) has a factor of 100 between the doses associated with 5% risk and with 95% risk, informally called "2 logs." This factor is similar to that of the exponential curve in Watanabe. In the wider curve ("wide, illustrative" in Fig. 4), the distance between 5% risk and 95% risk is a factor of 3100 ("3.5 logs"), similar to curves estimated by Kitajima *et al.* (41) for H5N1.

### ***S.10. Chain of infection, rebreathed volume, and the Wells-Riley equation***

The Wells-Riley relationship (42, 43) combines characteristics of a population, infectors, and the environment into a mean number of infections  $\mu$ :

$$\mu = \frac{Iqp\Delta t}{Q} \quad (\text{S.10})$$

where  $I$  is the number of infectious disease carriers in a space,  $q$  is the emission rate of infection quanta,  $p$  is the human breathing rate (average 8 L  $\text{min}^{-1}$ ),  $\Delta t$  is the time of the recipient's exposure, and  $Q$  is the ventilation rate. This value of  $\mu$  is then used in the Poisson distribution to determine a probability of infection.

$$P = 1 - \exp(-\mu) = 1 - \exp\left(-\frac{Iqp\Delta t}{Q}\right) \quad (\text{S.11})$$

The Wells-Riley equation has often been used in situations where the number of carriers and the ventilation rate is known or can be guessed. It has also been related to the reproductive number  $R_0$  and the susceptible-infectious-recovered (SIR) structure (44). Here, we suggest a slight reformulation of the mean infection rate to

distinguish separate roles within the chain of transmission: reservoir (carriers), environment, and host (recipients).

For a single emitter, the concentration of infectious material in a ventilated room at steady-state is  $q/Q$ , and the dose is the inhaled volume times the concentration:  $(q p t/Q)$ . The emission rate of infection quanta is a characteristic of an individual carrier and is an unknown in an emerging situation. Quantifying a carrier's emission rate as  $\Theta_c$ , quanta emitted per volume exhaled,

$$\Theta_c = q/p \quad (\text{S.12})$$

the mean number of infections considering all carriers can be written:

$$\mu = (\sum_c \Theta_c) \left( \frac{p^2 \Delta t}{Q} \right) \quad (\text{S.13})$$

where  $\sum_c$  indicates a sum over all carriers. When the room is in steady state, meaning that no concentrations change, the term  $(p^2 \Delta t/Q)$  is the rebreathed volume (RBV). Even in a more complex ventilation situation, the dose obtained from a single carrier is  $\Theta_c$  multiplied by the rebreathed volume.

$$\mu = (\sum_c \Theta_c)(RBV) \quad (\text{S.14})$$

The influence of particle size will be discussed later. Until then, we acknowledge that particle size does have an influence by using ERBV instead of RBV in each equation.

Next, we add some terms that account for other variations. Some infectious individuals might exhale more or less volume, and likewise some susceptible individuals might inhale more or less. These factors can be represented by adjustment ratios between the individual's breathing rate and the average human breathing rate:  $\gamma_c$  for the carrier,  $\gamma_s$  for the susceptible host, so that

$$\mu = (\sum_c \gamma_c \Theta_c)(RBV) \gamma_s \quad (\text{S.15})$$

A major insight from Wells' work was the use of an infection quantum. This concept liberated the analyst from quantifying exactly how many virions or other pathogens were emitted, or how many were required in a minimum dose. The only requirement was determining the emission rate of just enough pathogens to cause an illness, which could be retrospectively calculated from epidemiological observations. However, this use of indivisible quanta implies that the minimal infective dose is identical for every recipient. The infectious dose of SARS-CoV-2, or any emerging disease, for humans is unknown and dependent on numerous host factors, including receptor binding and distribution. It is possible that some hosts are susceptible to a lower dose of the virus than others. Again using a ratio  $\varphi$  between the minimal infective dose for the susceptible individual and that for an 'average' individual,

$$\mu = (\sum_c \gamma_c \theta_c)(ERBV) \left( \frac{\gamma_s}{\phi_s} \right) \quad (\text{S.16})$$

The mean infection rate is now separated into three distinct components that parallel the divisions in Figure 1, as summarized in Table S.7.

The purpose of including the ratios  $\gamma_i$ ,  $\gamma_s$ , and  $\phi_s$  is not to call for more information that is difficult to acquire, particularly for a novel disease. When characteristics of individual emitters are not known, equation (S.14) can be used. However, Equation (S.16) makes explicit the roles of carrier characteristics and individual susceptibility when selecting situations for interaction. For example, if breathing rates of both emitters and recipients increase by about a factor of 7 in exercise rooms ( $\gamma_i=7$ ,  $\gamma_s=7$ ), then achieving the mean infection rate found in a room of sedentary people would require decreasing person-to-person ERBV by a factor of 49, even without accounting for changes in exhaled infection quanta. Likewise, if it is found that individuals between ages 70-75 are infected at one-quarter the dose of the average population, ERBV for their situations should decrease by a factor of 4 compared with another situation that has an acceptable mean infection rate for the average population.

### S.10.1. Particle size dependence

The quantity *ERBV* replaced the simpler *RBV* to communicate the influence of particle size on pathogen transport and loss. Other parameters in Equation (S5) or (S8) also depend on particle size, especially  $\Theta_c$ . Emission rates differ with size, as do the location of deposition within the susceptible host, the susceptibility, and hence the minimal infective dose. Using the subscript *d* to indicate particle diameter, the simpler and more complex equations become, respectively,

$$\mu = \sum_d \mu_d = \sum_d [(\sum_c \theta_{c,d})(ERBV_d)] \quad (\text{S.14a})$$

$$\mu = \sum_d \mu_d = \sum_d [(\sum_c \gamma_{c,d} \theta_{c,d})(ERBV_d)] \left( \frac{\gamma_{s,d}}{\phi_{s,d}} \right) \quad (\text{S.16a})$$

This size dependence may also seem to impose a need for information that might be scarce. The text shows, however, that  $ERBV_d$  can vary by one or two orders of magnitude between sizes. This difference in size-dependent contributions to  $\mu$  does add complexity, but it also isolates a variation that might be exploitable in analysis.

### S.10.2 Probability of infection, mean infection rate, and accumulated interactions

The Wells-Riley equation was originally developed to study a school measles outbreak – a situation where exposure occurred in a well-defined, constant situation. A single mean infection rate was appropriate for that situation. When carriers may be encountered through a range of situations, such as a series of

university classes or a shopping trip, a summation of infectious contributions through each interaction (subscript  $j$ ) may be more appropriate.

$$\mu = \sum_j [(\sum_c \gamma_{c,j} \theta_{c,j})(ERBV_j)] \left(\frac{\gamma_s}{\phi_s}\right) \quad (\text{S.17})$$

The characteristics of the recipient remain separate, as do the terms for carriers and transport in *each* environment. Only after combining the accumulated interactions would it become appropriate to include the mean infection rate in the Poisson probability equation (S.11). Interactions that dominate the sum are most likely to be implicated in susceptibility. Determination of the time period over which doses might accumulate and collectively contribute to infection also requires investigation.

### **S.10.3 RBV versus rebreathed fraction**

The rebreathed fraction can be calculated from mass-balance equations, as well as estimated from CO<sub>2</sub> concentrations, even in complex ventilation situations (12). Rebreathed fraction is the closest published measure to RBV. Rebreathed fraction differs because it includes the exhalations of all breathing individuals in the building instead of just one. RBV also differs because it is not a fraction of exhalation, but the total exhaled and rebreathed volume, which is proportional to overall dose. RBV could be estimated from CO<sub>2</sub> concentrations measured in real situations if there were only a single individual in the building, or if every breathing individual were assumed to contribute equally.

### **S.10.4 RBV versus intake fraction**

Intake fraction is the amount of emitted mass that is subsequently inhaled by individuals. RBV is proportional to individual intake fraction (iF), as defined by Nazaroff (1). Since the emission is  $p$  (the human breathing rate) multiplied by the time over which the emitter is active ( $\Delta t_{emit}$ ), RBV is just

$$RBV = iF \cdot p \Delta t_{emit} \quad (\text{S.18})$$

The main difference is that RBV is not a fraction of exhaled air but a total dose.

### ***S.11. Influence of deposition loss on effectiveness of mitigation measures***

When deposition loss rates are significant, they can dominate total removal, and increasing ventilation may have a small incremental effect. This is not a new finding (e.g. (45)), but is so important to the ability to mitigate ERBV<sub>10</sub> that it is expanded here. When ventilation is added to a room, the fractional increase in ventilation flow ( $\delta Q/Q$ ) produces a fractional decrease in steady-state concentration ( $\delta C/C$ ), if ventilation is the only removal. This change in concentration is the expected reduction. For contaminants that have other removal mechanisms, adding

ventilation flow produces a lower reduction in concentration. We define ventilation efficiency as:

$$\eta_{vent} = \frac{-\partial C/C}{\partial Q/Q} \quad (\text{S.19})$$

or the ratio of the actual change in contaminant concentration (or ERBV) to the change that would be expected without deposition. Ventilation efficiency depends on the original ventilation rate in addition to deposition and other losses, and is graphed in Fig. S.6 for a range of deposition velocities and three baseline ventilation rates. The range of deposition velocities in Table S.2 is also shown on the figure. For 10- $\mu\text{m}$  particles, ventilation efficiency ranges from 1-25%.



## Figures

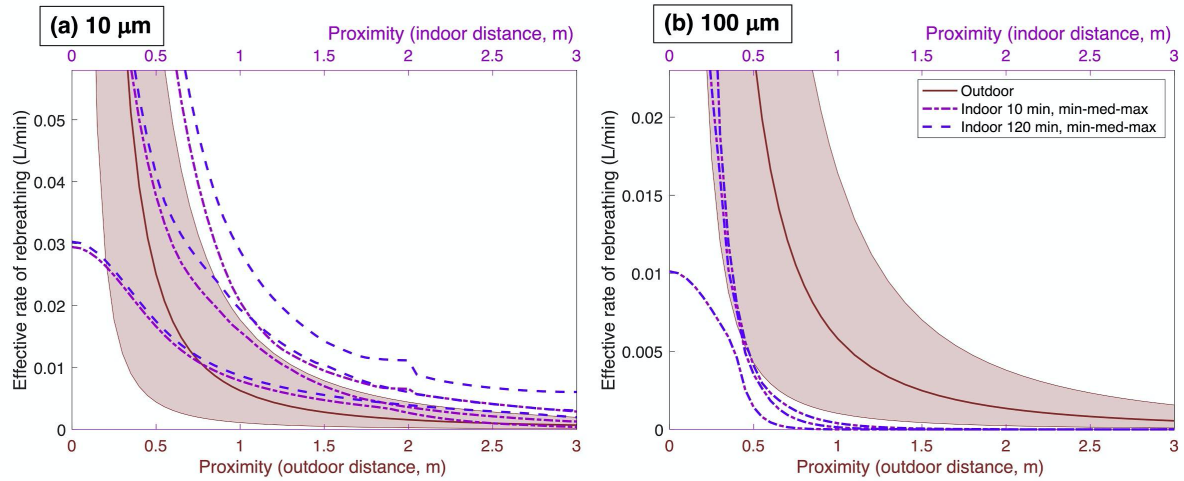

**Figure S1. Comparison between indoor and outdoor proximity effects.**

*Figure is for (a) 10- $\mu\text{m}$  and (b) 100- $\mu\text{m}$  particles (comparable to Figure 2(b) in text). 100- $\mu\text{m}$  particles travel farther outdoors because they are carried by wind. For 10- $\mu\text{m}$  particles, highest ERBV occurs in small rooms, which disappear from the summary curve when the maximum possible distance from emitter is reached, creating the discontinuity shown in the dashed lines.*

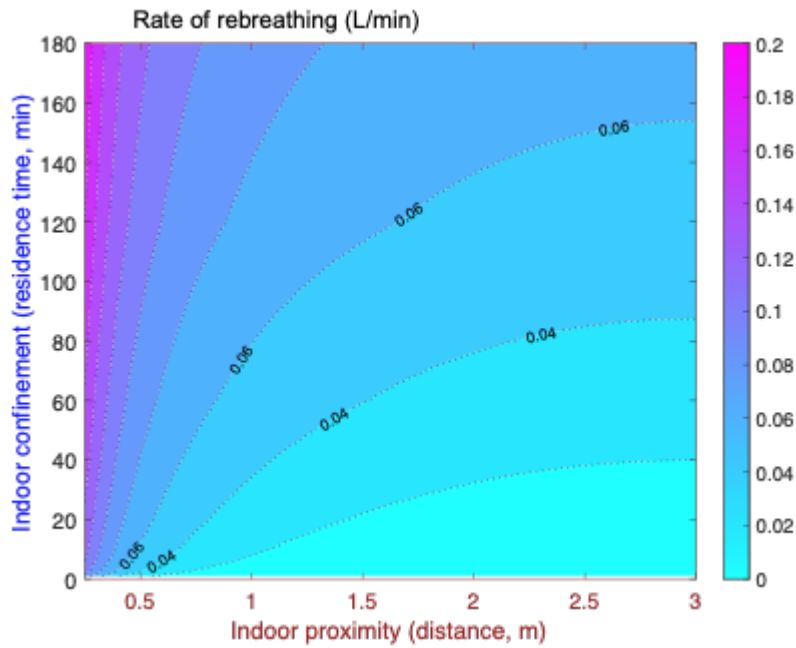

**Figure S.2. Rebreathing rates simulated by the indoor point-release model.**

*Figure is for 1- $\mu$ m particles, 0.3 air changes per hour, and 6mx6m room with emitter in the center. The marked contours bound the rate of rebreathing in a well-mixed case at steady-state.*

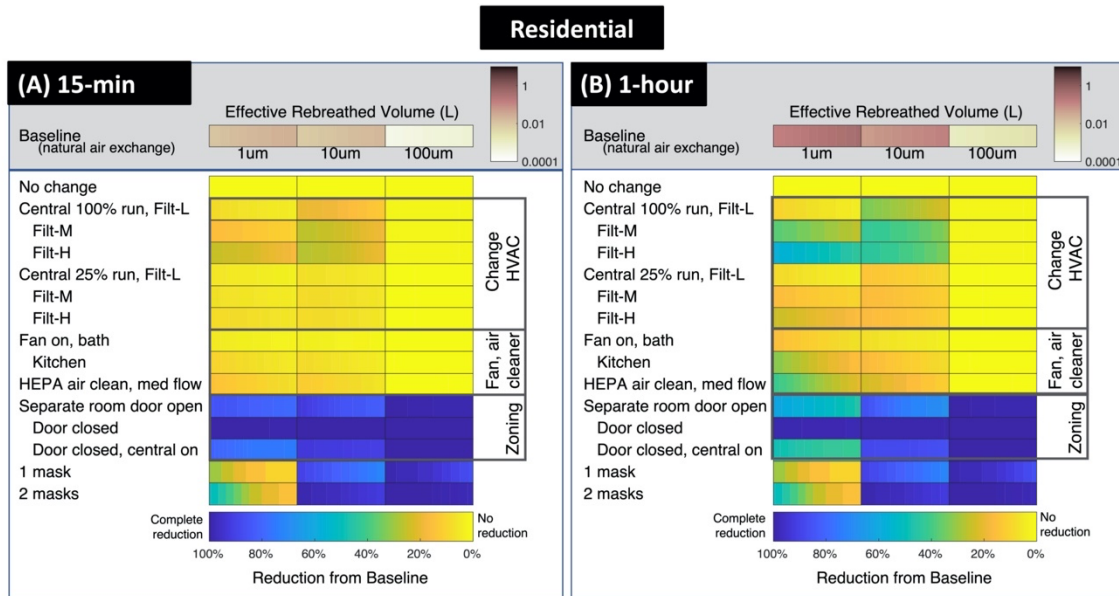

**Figure S.3. Baseline ERBV and mitigation cases for the residential case.**

15-minute and 1-hour interactions are shown; 4-hour interactions are in the text, Fig. 3. In the 15-minute case, ERBV is low because accumulation has not yet occurred, and reductions are also low.

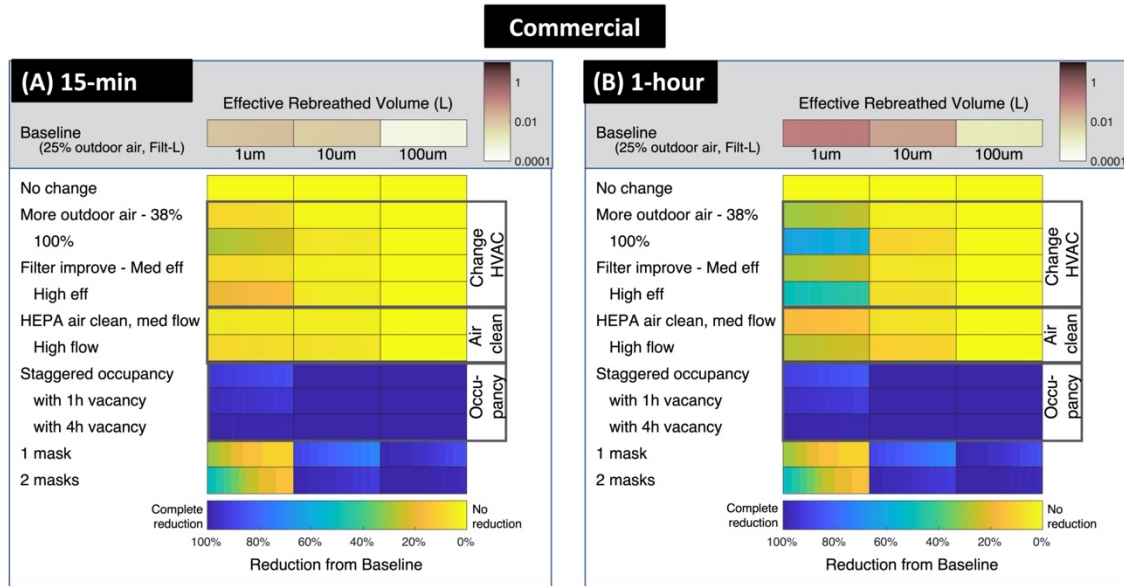

**Figure S.4. Baseline ERBV and mitigation cases for the commercial case.**

15-minute and 1-hour interactions are shown; 4-hour interactions are in the text, Fig. 3.

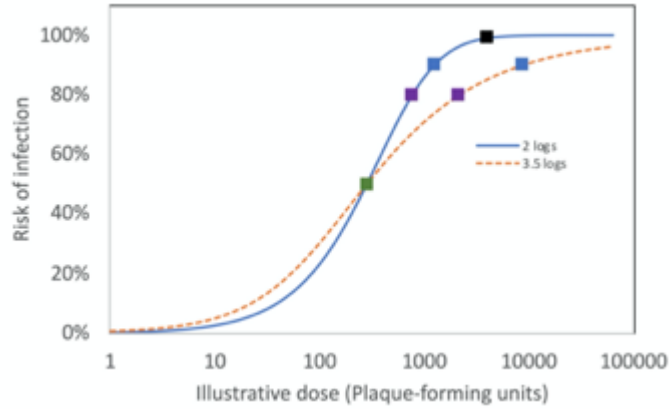

**Figure S.5. Illustrative dose-response curves with two widths.**

*“Logs” indicates the base-10 logarithm of the ratio between the doses at 95% and 5% risk. Square markers indicate starting points for risk response to dose in Figure 4 (text). Dose-response curves are for illustration only and have not been determined for SARS-CoV-2.*

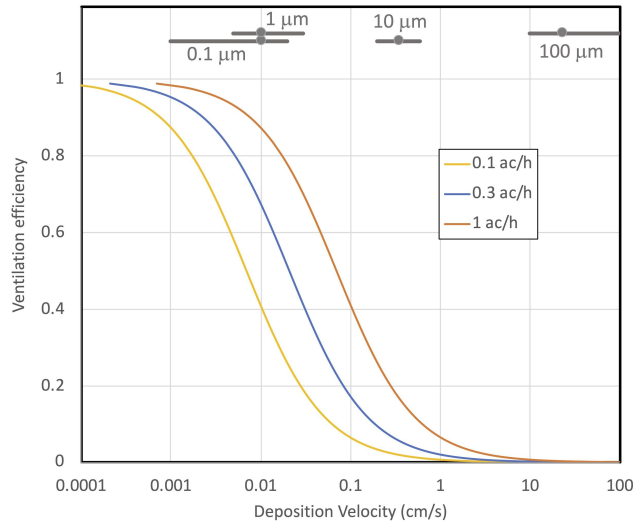

**Figure S.6. Ventilation efficiency for a range of deposition velocities.**

Ventilation efficiency is defined in Equation S.19.

## Tables

**Table S.1. Inputs to indoor point-release simulations.**

| Room size | Air changes h <sup>-1</sup> | Emitter location                       |
|-----------|-----------------------------|----------------------------------------|
| 4mx4m     | 0.1, 0.3, 1                 | (1m,1m); (2m, 2m)                      |
| 6mx6m     | 0.1, 0.3, 1                 | (1m, 1m); (2m, 2m); (3m, 3m)           |
| 10mx10m   | 0.1, 0.3, 1                 | (1m, 1m); (2m, 2m); (3m, 3m); (5m, 5m) |

**Table S.2. Deposition velocities**

| Particle Diameter (um) | Outdoor v <sub>a</sub> (m/s) | Indoor v <sub>a</sub> (m/s) |                        | Indoor loss rate <sup>a</sup> (h <sup>-1</sup> ) |
|------------------------|------------------------------|-----------------------------|------------------------|--------------------------------------------------|
|                        |                              | Central value               | Range                  |                                                  |
| 0.1                    | 3x10 <sup>-7</sup>           | 1x10 <sup>-4</sup>          | 0.1-2x10 <sup>-4</sup> | 0.01-0.29                                        |
| 1                      | 3x10 <sup>-5</sup>           | 1x10 <sup>-4</sup>          | 0.5-3x10 <sup>-4</sup> | 0.072-0.44                                       |
| 10                     | 3x10 <sup>-3</sup>           | 3.5x10 <sup>-3</sup>        | 2-6x10 <sup>-3</sup>   | 2.9-8.6                                          |
| 100                    | 3x10 <sup>-1</sup>           | 0.23                        | 0.1-1.0                | 140-1400                                         |

<sup>a</sup> For effective height of 2.5 m and deposition to upward-facing surfaces only.

**Table S.3. Residential baseline values**

| <b>Parameter</b> | <b>Value (range)</b>     | <b>Justification</b>                   |
|------------------|--------------------------|----------------------------------------|
| Floor area       | 100-240 m <sup>2</sup>   | Range of homes in USA                  |
| Ceiling Height   | 2.5 m                    | Typical height                         |
| Air change rate  | 0.1-1 ac h <sup>-1</sup> | Tight new homes to average older homes |



**Table S.4. Residential mitigation cases.**

Discussion comments relate to 4-hour interactions [Figure 3A in text.]

| Label                           | Detail                                                   | Support | Discussion                                                                                                                                                                                                                                                                       |
|---------------------------------|----------------------------------------------------------|---------|----------------------------------------------------------------------------------------------------------------------------------------------------------------------------------------------------------------------------------------------------------------------------------|
| Central air<br>100% run, Filt-L | 800-1600 cfm<br>[380 - 760 L s <sup>-1</sup> ]<br>MERV 6 | a, b    | Reduces ERBV <sub>10</sub> by about 50%; little effect on ERBV <sub>1</sub> because MERV6 filters are not rated to remove that size range                                                                                                                                        |
| ", Filt-M                       | Same flow<br>MERV 11                                     | c       | Reduces both ERBV <sub>1</sub> and ERBV <sub>10</sub> due to increase in filter quality.                                                                                                                                                                                         |
| ", Filt-H                       | Same flow<br>MERV 13                                     | d       | Greater reduction in ERBV <sub>1</sub> than MERV11; however, MERV13 filters have a higher pressure drop, which is too great for some residential air handlers                                                                                                                    |
| Central air 25%<br>run, Filt-L  | Same flow,<br>25% run time<br>MERV 6                     | a, b, e | Compared with 100% run, less reduction because less air goes through the filter. 3-12% change in ERBV <sub>1</sub> ; about 10-17% reduction in ERBV <sub>10</sub> . May correspond to normal operation during heating or cooling.                                                |
| ", Filt-M                       | Same condition,<br>MERV 11                               | c, e    | Some effect on ERBV <sub>1</sub> . Compared with MERV 6, little change in ERBV <sub>10</sub> , as even the lower-rated filters remove this size range.                                                                                                                           |
| ", Filt-H                       | Same condition,<br>MERV 13                               | d, e    | About 30-50% reduction in ERBV <sub>1</sub> ; similar ERBV <sub>10</sub> to Filt-M.                                                                                                                                                                                              |
| Bath fan                        | 80 cfm<br>[38 L s <sup>-1</sup> ]                        | f       | Lower end of mechanical ventilation. Reduces ERBV <sub>1</sub> by 13-40%. ERBV <sub>10</sub> is reduced by less than 10% because ventilation rate is lower than deposition rate.                                                                                                 |
| Kitchen fan                     | 200 cfm<br>[94 L s <sup>-1</sup> ]                       | g       | Upper end of mechanical ventilation. Reduces ERBV <sub>1</sub> particles substantially (30-60%) and ERBV <sub>10</sub> somewhat (10-20%).                                                                                                                                        |
| HEPA air clean,<br>med. flow    | 200 cfm<br>[95 L s <sup>-1</sup> ]                       | h       | Portable unit that filters indoor air without changing flow into or out of the home. Requires HEPA rated filter. Substantial reduction in ERBV <sub>1</sub> and some reduction in ERBV <sub>10</sub> . Lower flow or filter of lower quality would not produce these reductions. |

Table S.4 (continued)

| Label                      | Detail                                                | Support | Discussion                                                                                                                                                                                                 |
|----------------------------|-------------------------------------------------------|---------|------------------------------------------------------------------------------------------------------------------------------------------------------------------------------------------------------------|
| ", door closed             | 0.6 cfm<br>[0.3 L s <sup>-1</sup> ]<br>between rooms  | i, j    | Separating zones provides the greatest decrease in ERBV <sub>1</sub> , ERBV <sub>10</sub> , and ERBV <sub>100</sub> of all measures. Preventing release into a mixed space is more effective than removal. |
| ", door closed, central on | Same flow between rooms, central air handler 100% run | i, a, b | Central air handler with standard filter installed largely overcomes effect of closing doors                                                                                                               |

Support notes for Table S.4.

- [a] The range of central air handler flows covers most homes in the United States (46). Higher flows occur but are not common except in very large homes. The lowest flow rate was used for small homes (100 m<sup>2</sup>) and the highest for large homes (240 m<sup>2</sup>).
- [b] MERV 6 is the minimum required by ASHRAE Standard 62.2-2019 (ASHRAE 2019a) and would therefore be installed in most homes.
- [c] MERV 11 is the minimum for any removal of submicron particles (ASHRAE Standard 52.2-2017)
- [d] MERV 13 is the minimum for removing 50% of submicron particles (ASHRAE Standard 52.2-2017).
- [e] Illustrates a typical cycle to meet heating or cooling loads, in which the air handler is operating about 25% of the time. Actual run-time depends on outdoor conditions and desired indoor temperature.
- [f] Flow rate is a common upper value for variable-speed bathroom fans from multiple manufacturers, and also a common value required for single-family homes.
- [g] Moderate flow for commercially available kitchen range hoods. Many kitchen fans can produce more flow, but the higher flow rates are associated with noise levels that render operation unlikely outside of cooking events.
- [h] Common medium flow rate based on product literature, online search as of August 2020. We assume that High Efficiency Particulate Air (HEPA) filters are installed in these portable air cleaners. These filters correspond to MERV 16, which remove at least 95% of all particles.
- [i] Miller and Nazaroff (47) provided flow rates between rooms with doors open and closed.
- [j] For the separated room case, a room of 80 m<sup>2</sup> (small house) or 120 m<sup>2</sup> (large house) was divided from the remainder of the house. Natural air flow into each of the two separated zones was assumed to be proportional to floor area and the total was equal to the baseline case. Air handler flow to and from each zone was also proportional to floor area.

**Table S.5. Commercial baseline values**

| <b>Parameter</b>         | <b>Value (range)</b>   | <b>Justification</b>                            |
|--------------------------|------------------------|-------------------------------------------------|
| Floor area               | 150-200 m <sup>2</sup> | Open office arrangement, similar to residential |
| Ceiling height           | 3 m                    | Typical height                                  |
| Flow through air handler | 1600 cfm<br>[760 L/s]  | Cooling requirement for the space               |
| Outdoor air supply       | 200 cfm<br>[94 L/s]    | Minimum per standard                            |
| Filtration               | MERV 8                 | Minimum per standard                            |

**Table S.6. Commercial mitigation cases.**

Discussion comments relate to 4-hour interactions [Figure 3B in text.]

| Label                     | Detail                                      | Support | Discussion                                                                                                                                                                                                                                                 |
|---------------------------|---------------------------------------------|---------|------------------------------------------------------------------------------------------------------------------------------------------------------------------------------------------------------------------------------------------------------------|
| More outdoor air - 38%    | Outdoor air<br>600 cfm<br>[280 L/s]         | a       | Reduces ERBV <sub>1</sub> by about 50%. ERBV <sub>10</sub> is reduced by only about 3% because baseline includes filtration of 10-um particles.                                                                                                            |
| " - 100%                  | Outdoor air<br>1600 cfm<br>[760 L/s]        | a       | Reduces ERBV <sub>1</sub> by 80% and ERBV <sub>10</sub> by 10%. Corresponds to all supply air coming from outside; that is, no recirculation. Greater outdoor air fraction would impose an energy burden caused by conditioning of a much larger air flow. |
| Filter improve - Med eff  | MERV 11                                     | b, c    | Reduces ERBV <sub>1</sub> by about 50%, similar to 600 cfm outdoor air. ERBV <sub>10</sub> is reduced by only about 6% because baseline includes filtration of 10-um particles.                                                                            |
| " - High eff              | MERV 13                                     | b, d    | Reduces ERBV <sub>1</sub> by about 70%, slightly less than 100% outdoor air. ERBV <sub>10</sub> is reduced by only about 8% below baseline, which includes filtration of 10-um particles.                                                                  |
| HEPA air clean, med. flow | 200 cfm<br>[95 L/s]                         | e       | Portable unit that filters indoor air without changing flow into or out of the space. Requires HEPA rated filter. About 30-35% reduction in ERBV <sub>1</sub> and 6-7% in ERBV <sub>10</sub> , for reasons similar to measures above.                      |
| " - High flow             | 350 cfm<br>[170 L/s]                        | f       | 45-50% reduction in ERBV <sub>1</sub> , similar to 38% outdoor air; 10% reduction in ERBV <sub>10</sub> .                                                                                                                                                  |
| Staggered occupancy       | Recipient enters right after emitter leaves | g       | 50-60% reduction in ERBV <sub>1</sub> ; entering occupants encounter accumulated air from the previous occupant. Order-of-magnitude reduction in ERBV <sub>10</sub> .                                                                                      |
| " - with 1h vacancy       | -                                           | g       | 75-85% reduction in ERBV <sub>1</sub> as air clears out during vacancy                                                                                                                                                                                     |
| " - with 4h vacancy       | -                                           | g       | Order-of-magnitude reduction in ERBV <sub>1</sub>                                                                                                                                                                                                          |

Support notes for Table S.6.

[a] "Outdoor air" is the total drawn in from outdoors for purposes of ventilation.

[b] Assuming outdoor air flow as in the baseline, 200 cfm.

- [c] MERV 11 is the minimum for any removal of submicron particles (ASHRAE Standard 52.2-2017)
- [d] MERV 13 is the minimum for removing 50% of submicron particles (ASHRAE Standard 52.2-2017).
- [e] Common medium flow rate based on product literature, online search as of August 2020. We assume that High Efficiency Particulate Air (HEPA) filters are installed in these portable air cleaners. These filters correspond to MERV 16, which remove at least 95% of all particles.
- [f] Upper end of flow range attainable by most models in an on-line search.
- [g] In staggered-occupancy scenarios, the emitter remains in the office for 4 hours, leaves, and then the recipient enters and remains for 4 hours. Vacancy period refers to the duration between the emitter's exit and recipient's entry.

**Table S.7. Terms in Wells-Riley equation for mean infection rate and their relationship to the chain of infection.**

| Component of chain                | Term in equation             | Comment                                                   |
|-----------------------------------|------------------------------|-----------------------------------------------------------|
| Reservoir                         |                              |                                                           |
| Population prevalence             | $\Sigma_c$                   | Sets the number of carriers over which to sum             |
| Carrier breathing adjustment      | $\gamma_c = p_c / p_{avg}$   | $p_{avg} = 8 \text{ L/min}$                               |
| Carrier emission rate             | $\Theta_c$                   | Infection quanta per volume of exhaled air ( $\#/m^3$ )   |
| Environment                       |                              |                                                           |
| Intersection through interactions | -                            | Sets the archetypal environment in which to calculate RBV |
| Physical environment              | $ERBV_d$                     | Effective rebreathed volume for particles of size $d$     |
| Host                              |                              |                                                           |
| Susceptible breathing adjustment  | $\gamma_s = p_s / p_{avg}$   |                                                           |
| Susceptibility adjustment         | $\phi_s = MID_s / MID_{avg}$ | MID = minimal infective dose                              |

### Citations

1. W. W. Nazaroff, Inhalation intake fraction of pollutants from episodic indoor emissions. *Build. Environ.* **43**, 269–277 (2008).
2. G. N. Sze To, C. Y. H. Chao, Review and comparison between the Wells–Riley and dose-response approaches to risk assessment of infectious respiratory diseases. *Indoor Air* **20**, 2–16 (2010).
3. S. R. Hanna, G. A. Briggs, R. P. Hosker Jr, *Handbook on atmospheric diffusion* (National Oceanic and Atmospheric Administration, 1982).
4. F. Gifford Jr, “Statistical properties of a fluctuating plume dispersion model” in *Advances in Geophysics*, (Elsevier, 1959), pp. 117–137.
5. S. P. Arya, Modeling and parameterization of near-source diffusion in weak winds. *J. Appl. Meteorol.* **34**, 1112–1122 (1995).

6. G. I. Taylor, Diffusion by Continuous Movements. *Proc. London Math. Soc.* **s2-20**, 196–212 (1922).
7. C. D. Jones, On the structure of instantaneous plumes in the atmosphere. *J. Hazard. Mater.* **7**, 87–112 (1983).
8. A. Celani, E. Villermaux, M. Vergassola, Odor Landscapes in Turbulent Environments. *Phys. Rev. X* **4**, 41015 (2014).
9. J. A. Farrell, J. Murlis, X. Long, W. Li, R. T. Cardé, Filament-based atmospheric dispersion model to achieve short time-scale structure of odor plumes. *Environ. fluid Mech.* **2**, 143–169 (2002).
10. J. Murlis, C. D. Jones, Fine-scale structure of odour plumes in relation to insect orientation to distant pheromone and other attractant sources. *Physiol. Entomol.* **6**, 71–86 (1981).
11. J. Moncrieff, R. Clement, J. Finnigan, T. Meyers, “Averaging, detrending, and filtering of eddy covariance time series” in *Handbook of Micrometeorology*, (Springer, 2004), pp. 7–31.
12. S. N. Rudnick, D. K. Milton, Risk of indoor airborne infection transmission estimated from carbon dioxide concentration. *Indoor Air* **13**, 237–245 (2003).
13. W. W. Nazaroff, M. Nicas, S. L. Miller, Framework for Evaluating Measures to Control Nosocomial Tuberculosis Transmission. *Indoor Air* **8**, 205–218 (1998).
14. L. Gammaitoni, M. C. Nucci, Using a mathematical model to evaluate the efficacy of TB control measures. *Emerg. Infect. Dis.* **3**, 335 (1997).
15. C. J. Noakes, P. A. Sleight, Mathematical models for assessing the role of airflow on the risk of airborne infection in hospital wards. *J. R. Soc. Interface* **6**, S791–S800 (2009).
16. W. S. Dols, B. J. Polidoro, “CONTAM user guide and program documentation version 3.2” (2015).
17. L. Palmiter, T. Bond, Interaction of mechanical systems and natural infiltration in *Proc. 12th AIVC Conference, Ottawa, Canada*, (1991), pp. 285–295.
18. K.-C. Cheng, *et al.*, Modeling Exposure Close to Air Pollution Sources in Naturally Ventilated Residences: Association of Turbulent Diffusion Coefficient with Air Change Rate. *Environ. Sci. Technol.* **45**, 4016–4022 (2011).
19. D. Licina, Y. Tian, W. W. Nazaroff, Inhalation intake fraction of particulate matter from localized indoor emissions. *Build. Environ.* **123**, 14–22 (2017).

20. L. Liu, Y. Li, P. V. Nielsen, J. Wei, R. L. Jensen, Short-range airborne transmission of expiratory droplets between two people. *Indoor Air* **27**, 452–462 (2017).
21. A. C. K. Lai, W. W. Nazaroff, Modeling Indoor Particle Deposition from Turbulent Flow onto Smooth Surfaces. *J. Aerosol Sci.* **31**, 463–476 (2000).
22. N. P. Gao, J. L. Niu, Modeling particle dispersion and deposition in indoor environments. *Atmos. Environ.* **41**, 3862–3876 (2007).
23. D. K. Farmer, *et al.*, Overview of HOMEChem: House observations of microbial and environmental chemistry. *Environ. Sci. Process. Impacts* **21**, 1280–1300 (2019).
24. Y. Tian, *et al.*, Indoor emissions of total and fluorescent supermicron particles during HOMEChem. *Indoor Air* (2020).
25. C. Howard-Reed, L. A. Wallace, S. J. Emmerich, Effect of ventilation systems and air filters on decay rates of particles produced by indoor sources in an occupied townhouse. *Atmos. Environ.* **37**, 5295–5306 (2003).
26. T. L. Thatcher, D. W. Layton, Deposition, resuspension, and penetration of particles within a residence. *Atmos. Environ.* **29**, 1487–1497 (1995).
27. A. C. K. Lai, Particle deposition indoors: a review. *Indoor Air* **12**, 211–214 (2002).
28. E. P. Fischer, *et al.*, Low-cost measurement of facemask efficacy for filtering expelled droplets during speech. *Sci. Adv.*, eabd3083 (2020).
29. W. Hao, *et al.*, Filtration performances of non-medical materials as candidates for manufacturing facemasks and respirators. *Int. J. Hyg. Environ. Health* **229**, 113582 (2020).
30. T. Oberg, L. M. Brosseau, Surgical mask filter and fit performance. *Am. J. Infect. Control* **36**, 276–282 (2008).
31. United States Census, “American Housing Survey” (United States Census Bureau Washington, DC, 2017).
32. ASHRAE, “ANSI/ASHRAE standard 62.2-2019: Ventilation and Acceptable Indoor Air Quality in Residential Buildings” (2019).
33. A. K. Persily, *Understanding air infiltration in homes* (Ph.D. dissertation, 1983).
34. W. R. Chan, M. H. Sherman, Building Envelope and Duct Airtightness of New US Dwellings in *Thermal Performance of the Exterior Envelopes of Whole Buildings XII International Conference*, (2013).



35. W. R. Chan, J. Joh, M. H. Sherman, Analysis of air leakage measurements of US houses. *Energy Build.* **66**, 616–625 (2013).
36. S. Pigg, D. Cautley, P. W. Francisco, Impacts of weatherization on indoor air quality: A field study of 514 homes. *Indoor Air* **28**, 307–317 (2018).
37. ASHRAE, “ANSI/ASHRAE standard 52.2-2017: Method of Testing General Ventilation Air-Cleaning Devices for Removal Efficiency by Particle Size” (American Society of Heating Refrigerating and Air-Conditioning Engineers, 2017).
38. W. J. Riley, T. E. McKone, A. C. K. Lai, W. W. Nazaroff, Indoor particulate matter of outdoor origin: importance of size-dependent removal mechanisms. *Environ. Sci. Technol.* **36**, 200–207 (2002).
39. ASHRAE, “ANSI/ASHRAE Standard 62.1-2019: Ventilation for Acceptable Indoor Air Quality” (2019).
40. T. Watanabe, T. A. Bartrand, M. H. Weir, T. Omura, C. N. Haas, Development of a dose-response model for SARS coronavirus. *Risk Anal. An Int. J.* **30**, 1129–1138 (2010).
41. M. Kitajima, Y. Huang, T. Watanabe, H. Katayama, C. N. Haas, Dose–response time modelling for highly pathogenic avian influenza A (H5N1) virus infection. *Letts. Appl. Microbiol.* **53**, 438–444 (2011).
42. E. C. Riley, G. Murphy, R. L. Riley, Airborne spread of measles in a suburban elementary school. *Am. J. Epidemiol.* **107**, 421–432 (1978).
43. R. L. Riley, Airborne infection. *Am. J. Med.* **57**, 466–475 (1974).
44. C. Liao, C. Chang, H. Liang, A probabilistic transmission dynamic model to assess indoor airborne infection risks. *Risk Anal. An Int. J.* **25**, 1097–1107 (2005).
45. C. He, L. Morawska, J. Hitchins, D. Gilbert, Contribution from indoor sources to particle number and mass concentrations in residential houses. *Atmos. Environ.* **38**, 3405–3415 (2004).
46. J. Lutz, C. Dunham-Whitehead, A. Lekov, J. McMahon, “Modeling energy consumption of residential furnaces and boilers in US homes” (Lawrence Berkeley National Laboratory, 2004).
47. S. L. Miller, W. W. Nazaroff, Environmental tobacco smoke particles in multizone indoor environments. *Atmos. Environ.* **35**, 2053–2067 (2001).
